1  
2  
3  
4  
5  
6  
7  
8  
9  
10  
11  
12  
13  
14  
15  
16  
17  
18  
19  
20  
21  
22  
23  
24  
25  
26  
27  
28  
29  
30

**A SUMO-dependent regulatory switch connects the piRNA pathway to the heterochromatin machinery in *Drosophila***

Veselin I. Andreev<sup>1,2\*</sup>, Changwei Yu<sup>1,\*</sup>, Juncheng Wang<sup>3</sup>, Jakob Schnabl<sup>1,2</sup>, Laszlo Tirian<sup>1</sup>, Maja Gehre<sup>1</sup>, Dominik Handler<sup>1</sup>, Peter Duchek<sup>1</sup>, Maria Novatchkova<sup>1</sup>, Lisa Baumgartner<sup>1,2</sup>, Katharina Meixner<sup>1</sup>, Grzegorz Sienski<sup>1</sup>, Dinshaw J. Patel<sup>3</sup> & Julius Brennecke<sup>1,4</sup>

<sup>1</sup> Institute of Molecular Biotechnology of the Austrian Academy of Sciences (IMBA),  
Vienna BioCenter (VBC), Dr. Bohr-Gasse 3, 1030 Vienna, Austria

<sup>2</sup> Vienna BioCenter PhD Program, Doctoral School of the University at Vienna and Medical  
University of Vienna

<sup>3</sup> Structural Biology Program, Memorial Sloan Kettering Cancer Center, New York, NY 10065, USA

<sup>4</sup> correspondence: [julius.brennecke@imba.oeaw.ac.at](mailto:julius.brennecke@imba.oeaw.ac.at)

\* these authors contributed equally

31 **SUMMARY**

32 **Nuclear Argonaute proteins, guided by small RNAs, mediate sequence-specific heterochromatin**  
33 **formation. The molecular principles that link Argonaute-small RNA complexes to cellular**  
34 **heterochromatin effectors upon binding to nascent target RNAs are poorly understood. Here, we**  
35 **elucidate the mechanism by which the PIWI interacting RNA (piRNA) pathway connects to the**  
36 **heterochromatin machinery in *Drosophila*. Piwi-mediated stabilization of the corepressor complex**  
37 **SFinX on chromatin leads to SUMOylation of its subunit Panoramix. SUMOylation, together with**  
38 **an amphipathic LxxLL motif in Panoramix's intrinsically disordered repressor domain, are**  
39 **necessary and sufficient to recruit small ovary (Sov), a multi-zinc finger protein essential for**  
40 **general heterochromatin formation and viability. Structure-guided mutations that abrogate the**  
41 **Panoramix–Sov interaction or that prevent SUMOylation of Panoramix uncouple Sov from the**  
42 **piRNA pathway, resulting in viable but sterile flies in which Piwi-targeted transposons are**  
43 **derepressed. Thus, by coupling recruitment of a corepressor to nascent transcripts with its**  
44 **SUMOylation, Piwi engages the heterochromatin machinery specifically at transposon loci.**

## INTRODUCTION

Heterochromatin, the condensed and repressive state of chromatin, represents an essential gene regulatory, organizational and architectural principle of eukaryotic genomes. Its key function is to ensure genome integrity by restricting the activity of transposable elements, preventing illegitimate recombination within repetitive genomic sequences, and supporting chromosome segregation (Fedoroff, 2012; Grewal and Moazed, 2003; Janssen et al., 2018). Given its essential roles and its strong inhibitory impact on transcription, the efficient yet specific establishment of heterochromatin is crucial.

Establishing heterochromatin requires enzymes that modify histone tails (primarily histone deacetylation and Histone 3 lysine 9 methylation) and effector proteins that recognize these specific chromatin marks and whose activity leads to chromatin compaction, decreased nucleosome turnover, and transcriptional repression (reviewed in Allshire and Madhani, 2018). To direct the general heterochromatin machinery to defined genomic loci, cells use a variety of sequence specific strategies. Besides pathways that target sequence motifs in DNA (Ninova et al., 2019; Yang et al., 2017), an alternative and highly adaptive principle relies on small regulatory RNAs that guide nuclear Argonaute proteins to complementary nascent transcripts on chromatin (Grewal, 2010; Martienssen and Moazed, 2015).

The main nuclear small RNA pathway in metazoans is the PIWI-interacting RNA (piRNA) pathway (Czech et al., 2018; Ozata et al., 2018; Siomi et al., 2011). It operates primarily in gonads and protects the germline genome from invading transposons. In *Drosophila*, the nuclear Argonaute Piwi (Cox et al., 2000) targets nascent transposon transcripts by virtue of sequence complementarity to its associated piRNAs (Brennecke et al., 2007; Saito et al., 2006; Vagin et al., 2006). By poorly understood mechanisms, this leads to heterochromatin formation and potent repression of transcription at piRNA target loci (Le Thomas et al., 2013; Rozhkov et al., 2013; Sienski et al., 2012; Wang and Elgin, 2011).

To mediate co-transcriptional silencing, Piwi requires a multitude of nuclear factors, which can broadly be divided into two categories: Group I proteins (in flies: Asterix/Gtsf1, Maelstrom, and the SFiNX complex) are piRNA pathway specific. Their molecular functions are largely unknown, but their loss specifically leads to defects in Piwi-mediated heterochromatin formation and transposon de-repression in gonads. Consequently, flies with mutations in group I factors are sterile but viable (Batki et al., 2019; Donertas et al., 2013; Eastwood et al., 2021; Fabry et al., 2019; Muerdter et al., 2013; Murano et al.,

76 2019; Ohtani et al., 2013; Onishi et al., 2020; Schnabl et al., 2021; Sienski et al., 2015; Sienski et al.,  
77 2012; Yu et al., 2015). Group II proteins are also required for piRNA-guided heterochromatin formation,  
78 yet they execute heterochromatin formation downstream of various processes that specify  
79 heterochromatin. Group II factors are expressed in all tissues, their loss results in lethality, and they can  
80 therefore be classified as components of the general heterochromatin machinery. Examples of group II  
81 factors required for Piwi-mediated silencing are H3K9 methyltransferases, H3K4 demethylases, histone  
82 deacetylases, chromatin remodelers, the SUMO pathway, and proteins involved in chromatin compaction  
83 (Iwasaki et al., 2016; Mugat et al., 2020; Ninova et al., 2020a; Osumi et al., 2019; Sienski et al., 2015;  
84 Yu et al., 2015; Yang et al., 2019). When experimentally recruited to a reporter transgene via a  
85 heterologous DNA-binding domain, several group II factors are sufficient to initiate heterochromatin  
86 formation and transcriptional silencing (Batki et al., 2019; Ninova et al., 2020a; Yang et al., 2019).  
87 However, the mechanistic basis of how, and in which order, the piRNA pathway connects to group II  
88 factors, and how the underlying molecular interactions are controlled, is unknown.

89  
90 Within the *Drosophila* nuclear piRNA-pathway, the dimeric SFiNX complex (consisting of Panoramix,  
91 the Nxf2–Nxt1 heterodimer, and the dimerization factor LC8/Cutup) is the prime candidate for a piRNA  
92 pathway-specific factor acting at the interface to the heterochromatin machinery (Batki et al., 2019;  
93 Eastwood et al., 2021; Fabry et al., 2019; Murano et al., 2019; Schnabl et al., 2021; Sienski et al., 2015;  
94 Yu et al., 2015; Zhao et al., 2019). First, SFiNX is genetically required for Piwi-piRNA complexes to  
95 silence their targets. Second, experimental tethering of SFiNX to a nascent transcript induces co-  
96 transcriptional silencing and heterochromatin formation, independent of Piwi and group I factors. SFiNX  
97 is the only known piRNA pathway factor capable of inducing robust silencing, though Maelstrom  
98 tethering can induce silencing in some reporter constellations (Onishi et al., 2020). SFiNX's ability to  
99 induce silencing relies on the subunit Panoramix (Panx), an orphan protein with no similarity to known  
100 proteins or protein domains. Here we show that Piwi-mediated stabilization of SFiNX on chromatin leads  
101 to the multi-site conjugation of Panx with SUMO, a ubiquitin-like modifier (Gareau and Lima, 2010;  
102 Geiss-Friedlander and Melchior, 2007; Jentsch and Psakhye, 2013). SUMOylation of Panx's disordered  
103 silencing domain enables its direct interaction with the zinc finger repressor Small ovary (Sov), which is  
104 required for piRNA-guided, as well as for global heterochromatin formation (Benner et al., 2019; Czech  
105 et al., 2013; Jankovics et al., 2018; Ninova et al., 2020b). Our work uncovers the molecular principle that  
106 connects the piRNA pathway, once engaged at a target site, to the heterochromatin machinery.

## 107 RESULTS

### 108 **An amphipathic LxxLL motif in the intrinsically disordered silencing domain of Panx binds Sov**

109 To understand the molecular mechanisms underlying SFiNX-mediated heterochromatin formation, we  
110 focused on Panx, the subunit that encompasses SFiNX's silencing capacity. In cultured ovarian somatic  
111 stem cells (OSCs), Gal4-UAS mediated recruitment of Panx upstream of a GFP reporter transgene  
112 resulted in ~25-fold repression of GFP levels (Figure 1A, B). Based on amino acid composition and  
113 predictions for protein disorder and secondary structure, we divided Panx into three parts (Figure 1C):  
114 An acidic, proline-rich and intrinsically disordered N-terminal region (IDR; aa 1-195), an NLS-  
115 containing and positively charged central region (NCR; aa 196-262), and a mostly structured C-terminal  
116 part (aa 263-541), which interacts with Nxf2–Nxt1 and Cut up (Batki et al., 2019; Eastwood et al., 2021;  
117 Fabry et al., 2019; Murano et al., 2019; Schnabl et al., 2021; Zhao et al., 2019). Of the three Panx regions,  
118 the IDR harbored strong silencing capacity (Figure 1B). We attributed the more potent repressor activity  
119 of the IDR compared to full length Panx to its higher expression levels (Figure S1A), and the residual  
120 activity of the structured C-terminus to its dimerization with endogenous, full-length Panx (Eastwood et  
121 al., 2021; Schnabl et al., 2021). As for full-length Panx, IDR-mediated silencing was accompanied by  
122 H3K9 tri-methylation and hence heterochromatin formation at the reporter locus (Figure S1B). These  
123 experiments defined the acidic IDR as the critical silencing domain within Panx.

124  
125 To narrow down the silencing activity within the Panx IDR, we recruited sub-fragments to the reporter  
126 locus (Figure 1D left; Figure S1C). This revealed a strong repressor activity within a ~50 amino acid  
127 polypeptide (aa 82-138) that harbors a conserved hydrophobic motif (MLDSLL) (Figure 1D). The  
128 MLDSLL motif is reminiscent of the LxxLL motif, known from transcriptional regulators due to its role  
129 in interacting with co-activators and repressors (Plevin et al., 2005). Mutating the three leucine residues  
130 of the MLDSLL motif (MNDSQQ variant) greatly reduced, but did not abolish, the silencing capacity of  
131 the full IDR (Figure 1E; Figure S1D). However, in the context of a 27 amino acid peptide (aa 82-108),  
132 which has strong silencing capacity on its own, mutation of the LxxLL motif abrogated all repressive  
133 activity (Figure 1E; Figure S1D). Thus, the LxxLL motif is an important, but not the only, silencing  
134 determinant of Panx.

135  
136 To identify factors that bind the Panx LxxLL motif, we coupled biotinylated peptides (aa 82-108)  
137 harboring the wildtype or the mutant motif to streptavidin beads and performed pulldown experiments

138 with OSC nuclear extract. Quantitative mass spectrometry revealed a handful of significantly enriched  
139 proteins (Figure 1F; Table S1). Among the top interactors was the zinc finger protein Small ovary (Sov).  
140 Sov is essential for viability, required for transposon silencing, localizes to and is required for  
141 heterochromatin formation and interacts with Heterochromatin Protein 1 (HP1; Su(var)205) (Benner et  
142 al., 2019; Czech et al., 2013; Jankovics et al., 2018; Ninova et al., 2020b). In support of a physical Panx–  
143 Sov interaction, immuno-precipitation of GFP-tagged Panx from nuclear OSC lysate resulted in the  
144 specific co-purification of Sov (Figure 1G; Table S1). Together, our findings suggest that Panx, likely  
145 via an amphipathic LxxLL motif in its IDR, interacts with the general heterochromatin factor Sov.

### 148 **Sov is required for Piwi and Panx-mediated heterochromatin formation**

149 To test whether the identified physical interaction between Panx and Sov is functionally relevant, we  
150 turned to a co-transcriptional silencing assay that mimics piRNA-guided repression *in vivo*. Here,  
151 aptamer-based recruitment of Panx, specifically in germline cells, via the  $\lambda$ N–boxB system to nascent  
152 transcripts of a GFP-reporter results in silencing through heterochromatin formation (Figure 2A, B)  
153 (Sienski et al., 2015; Yu et al., 2015). Depletion of Sov, via transgenic RNAi in the germline, abolished  
154 GFP-silencing, indicating that Panx requires Sov for co-transcriptional silencing (Figure 2B; Figure  
155 S2A). To extend these findings to endogenous Panx targets we turned to OSCs, where piRNA-guided  
156 silencing and heterochromatin formation at transposon loci can be most accurately studied. We first  
157 determined H3K9me3 profiles in control or Sov-depleted OSCs. H3K9me3 levels within piRNA-  
158 targeted transposons (e.g. the endogenous retroviruses *gypsy* and *mdg1*) as well as in genomic regions  
159 flanking piRNA-repressed transposon insertions (mapped in the OSC genome) were strongly reduced in  
160 cells lacking Sov (Figure 2C; Figure S2B). In line with this, transposons under Piwi control in OSCs (as  
161 defined in Sienski et al., 2012) were strongly de-repressed in Sov-depleted cells (Figure 2D). Consistent  
162 with a direct involvement of Sov at piRNA-targeted transposons, ChIP-Seq experiments using an OSC  
163 line expressing endogenously GFP-tagged Sov revealed an enrichment of Sov at piRNA-targeted  
164 transposons and the genomic regions flanking the insertions of these transposons (Figure 2E; Figure  
165 S2C). Finally, we asked whether recruiting Sov ectopically to chromatin is sufficient to establish  
166 heterochromatin. Using the DNA tethering system in OSCs (Figure 1A), we targeted Sov upstream of  
167 the GFP reporter transgene. Four days after transfecting the Gal4-Sov expressing plasmid, we observed  
168 strong reporter silencing accompanied by increased H3K9me3 levels (Figure 2F, G; Figure S2D). Our

169 data confirm and extend previous findings that Sov is critically involved in Piwi and Panx-mediated  
170 transposon silencing (Benner et al., 2019; Jankovics et al., 2018). However, Sov does not act exclusively  
171 within the piRNA pathway: unlike piRNA pathway factor mutants, *sov* null mutants are lethal and loss  
172 of Sov impacts general heterochromatin formation (Benner et al., 2019; Jankovics et al., 2018; Ninova  
173 et al., 2020b). In support of this, depletion of Sov in OSCs mimicked depletion of the general  
174 heterochromatin factor HP1 and led not only to de-silencing of Piwi-repressed transposons, but also of  
175 numerous other transposons not impacted by loss of Piwi or Panx (e.g. *G6* or *gypsy7*; Figure 2D, H).  
176 Based on these findings, we concluded that the physical connection between Panx and Sov is a major  
177 intersection point between piRNA pathway and general heterochromatin machinery. We therefore set  
178 out to molecularly dissect the Panx–Sov interaction.

### 179 180 181 **Structural basis of the Panx–Sov interaction**

182 The 370 kDa Sov protein lacks annotated domains in its ~1,500 amino acid N-terminal half and harbors  
183 21 C2H2 zinc finger domains in its C-terminal half (Figure 3A) (Benner et al., 2019; Jankovics et al.,  
184 2018). To identify the region within Sov responsible for binding to Panx, we performed a Panx LxxLL  
185 peptide pulldown using nuclear OSC lysate subjected to mild sonication, which resulted in fragmentation  
186 of the Sov protein. We then determined where the identified peptides map along the Sov primary  
187 sequence and observed a strong clustering at the Sov N-terminus (Figure 3A). As LxxLL motifs in  
188 disordered regions of transcriptional regulators often bind to  $\alpha$ -helical domains of interacting proteins  
189 (Plevin et al., 2005), we searched for predicted folded domains in the N-terminal region of Sov with the  
190 protein homology algorithm HHPRED (Zimmermann et al., 2018). This revealed a putative  $\alpha$ -helical  
191 domain within the first one hundred amino acids of Sov (termed N-terminal domain, NTD; Figure 3A).  
192 To test whether this domain interacts with the Panx LxxLL peptide, we co-expressed GFP-tagged Sov  
193 NTD (aa 1-118) and the Panx LxxLL peptide (aa 82-108) in Schneider cells, which lack a piRNA  
194 pathway. Co-immunoprecipitation experiments revealed that the wildtype Panx peptide (fused to  
195 Gal4\_DBD-FLAG), but not the peptide with mutated LxxLL motif, interacted with the Sov NTD but not  
196 with GFP alone (Figure 3B). Similarly, when coupled to streptavidin beads, a biotinylated Panx peptide  
197 with LxxLL motif, but not the mutant variant, interacted with recombinant Sov NTD, whose extent could  
198 be refined to residues 14-90 (Figure 3C). Based on isothermal calorimetry (ITC) measurements, the Sov  
199 NTD bound the Panx LxxLL peptide with a dissociation constant of  $0.87 \pm 0.39 \mu\text{M}$ , while the mutant

200 peptide did not show measurable binding (Figure 3D). These findings are in line with our previous  
201 observation that the Panx peptide (aa 82-108) harboring the mutated LxxLL motif was inert in the  
202 reporter silencing assay (Fig. 1E).

203  
204 To gain atomic insight into the Panx–Sov interaction, we determined the X-ray crystal structure of the  
205 Sov NTD (aa 14-90) bound to the Panx peptide (aa 82-108) at 2.5 Å resolution. The Sov NTD folds into  
206 a three-helix bundle with helices  $\alpha 2$  and  $\alpha 3$  directly contacting the Panx LxxLL peptide, which adopts  
207 an  $\alpha$ -helical conformation (Figure 3E). Two types of interactions underlie the specific Panx-Sov  
208 association: first, a hydrophobic cleft within the Sov NTD formed by  $\alpha 2$  (residues L54, L57, L60) and  
209  $\alpha 3$  (residues I74, I77, L81) accommodates the hydrophobic LxxLL motif (residues M95, L96, L99,  
210 L100) of the Panx helix (Figure 3E). Second, the acidic Panx helix engages in hydrogen bond and salt  
211 bridge interactions with several positively charged residues lining the hydrophobic cleft of the Sov NTD  
212 (Figure 3E, F). To experimentally test the structural findings, we purified a mutant Sov NTD predicted  
213 to be incompatible with Panx binding. A charge reversal of two solvent accessible residues that do not  
214 contribute to stabilize the overall Sov NTD fold (K73E, K80E), resulted in loss of interaction with the  
215 Panx LxxLL peptide (Figure 3E, G). Altogether, our biochemical and structural data demonstrate a direct  
216 protein-protein interaction between the piRNA pathway factor Panx and the general heterochromatin  
217 factor Sov.

### 218 219 **A dual-binding mode between Panx and Sov, coordinated by Panx SUMOylation**

220 Since Panx requires Sov for silencing (Figure 2), we hypothesized that mutating the LxxLL motif within  
221 Panx should result in female sterility as seen in *panx* mutant flies. However, flies expressing a Panx  
222 variant with the MNDSQQ mutation showed only moderate fertility defects (~70% embryo hatching  
223 rate). Deleting the entire IDR of Panx instead resulted in complete sterility, phenocopying *panx* null  
224 mutants (Figure 4A). This mirrored results from the heterologous tethering assay, in which the LxxLL  
225 mutant IDR retained moderate silencing activity (Figure 1E) and suggested additional silencing  
226 determinants or LxxLL-independent physical links between Panx and Sov. We focused on Smt3  
227 (*Drosophila* SUMO), a small Ubiquitin-like protein that has been linked to Piwi-mediated silencing  
228 (Ninova et al., 2020a), and that was enriched in co-immunoprecipitation experiments from OSC lysate  
229 using both, Panx or Sov as bait (Figure 1G; Figure S3A; Table S1). SUMO is covalently conjugated to  
230



231 acceptor lysine residues (often within the consensus sequence  $\Psi$ -K-x-D/E, with  $\Psi$  being a large  
232 hydrophobic residue) in accessible regions of substrate proteins and can mediate or strengthen protein-  
233 protein interactions (Gareau and Lima, 2010; Jentsch and Psakhye, 2013; Pichler et al., 2017). This  
234 requires one binding partner to be SUMOylated and the other to contain a SUMO interacting motif (SIM).  
235 When analyzing the primary sequences of Panx and Sov, we found an intriguing pattern that would be  
236 consistent with a SUMO-dependent Panx–Sov interaction: Five of the eleven lysine residues within the  
237 Panx IDR are predicted SUMOylation sites (K6, K10, K82, K88, K143). The Sov NTD on the other hand  
238 is flanked on both sides by two SIMs (computational predictions after Zhao et al., 2014).

239  
240 To investigate whether Panx is SUMOylated *in vivo*, we generated flies expressing GFP-tagged Smt3  
241 from the *smt3* promoter, and immuno-precipitated GFP-Smt3 from ovarian lysate under denaturing wash  
242 conditions, thereby enriching for proteins covalently bound to Smt3 (Figure 4B; Figure S3B; Table S1).  
243 Among the enriched proteins (compared to an IP from wildtype ovary lysate) were the core SUMOylation  
244 machinery (Smt3, E1 activating enzyme Uba2–Aos1, E2 conjugating enzyme Lwr/Ubc9), the SUMO E3  
245 Ligase Su(var)2-10, and Panx (Figure 4C). No other SFiNX subunit, nor Piwi, were enriched in the GFP-  
246 Smt3 IP. To substantiate these findings, we performed western blot experiments on whole cell extracts  
247 from ovaries and OSCs that were prepared in the presence of N-ethylmaleimide (NEM), an irreversible  
248 inhibitor of de-SUMOylating enzymes. This revealed, besides native Panx (running at ~100 kDa despite  
249 a molecular weight of 61 kDa), a prominent ladder of Panx isoforms with increasing molecular weight,  
250 consistent with an increasing number of SUMO moieties (Figure 4D, E).

251  
252 To probe whether the observed isoform ladder is indeed due to SUMOylation of Panx, we performed  
253 immuno-precipitation experiments using GFP-trap beads with lysates from either wildtype OSCs or  
254 OSCs expressing endogenously FLAG-GFP tagged Panx. Both input samples showed native Panx and  
255 the isoform ladder (Figure 4F left), and we observed an identical pattern of bands, specific for the tagged  
256 Panx cell line, with an antibody against the FLAG epitope (Figure 4F middle). After immunoprecipitation  
257 with anti-GFP nanobodies, native Panx and the higher molecular weight isoforms were specifically  
258 recovered from OSCs expressing FLAG-GFP-Panx. Western blot analysis with an antibody against Smt3  
259 confirmed that the laddered signal represented SUMOylated Panx (Figure 4F right). Considering the  
260 absence of SUMO chains in *Drosophila* (Urena et al., 2016), our results suggest that, at steady state, a  
261 substantial fraction of Panx in OSCs is conjugated with SUMO on multiple lysine residues.

262

263 SUMO promotes protein-protein interactions by binding to SIMs in partner proteins. The best  
264 characterized SIMs are composed of three to four exposed aliphatic amino acids (I, V, L), often flanked  
265 by negatively charged residues, that bind to a hydrophobic groove in SUMO (Kerscher, 2007). The Sov  
266 core NTD (aa 14-90) is immediately flanked by two putative SIMs: EDDVVVV (aa 5-11) and IIDI (aa  
267 96-99). To test whether these predicted SIMs are relevant for the Panx–Sov interaction, we immobilized  
268 a series of recombinant Sov NTD variants on beads and incubated them with nuclear OSC lysate (Figure  
269 4G). The core NTD without SIMs (NTD  $\Delta$ -SIMs) was indifferent in terms of binding native or  
270 SUMOylated Panx. In contrast, the NTD with both flanking SIMs (NTD + SIMs) had a strong binding  
271 preference for SUMOylated Panx isoforms. An NTD that was unable to interact with the Panx LxxLL  
272 peptide but that was flanked by both SIMs (NTD[2KE] + SIMs) bound exclusively to heavily  
273 SUMOylated Panx isoforms, albeit weakly. The 2KE mutant NTD without flanking SIMs (NTD[2KE]  
274  $\Delta$ -SIMs) was inert in respect to Panx binding, comparable to GFP alone (Figure 4G). These results  
275 strongly suggest a model where SUMOylated Panx interacts with Sov via a dual mode: (1), the NTD–  
276 LxxLL interaction and (2) immediately flanking SUMO-SIM interactions.

277

278 To test the dual-binding model, we first asked whether expression of the isolated Sov N-terminus  
279 interferes in a dominant negative manner with the ability of Panx to recruit endogenous Sov. Indeed,  
280 expression of the NTD with flanking SIMs, but not of the core NTD alone, resulted in de-repression of  
281 piRNA-targeted transposons (e.g. *mdg1* and *gypsy*) and of the *expanded* gene, which is repressed in a  
282 Piwi-dependent manner due to an intronic *gypsy* insertion (Figure 5A; Figure S4A) (Sienski et al., 2012).  
283 As a more direct test, we used the DNA tethering assay (Figure 1A) and determined the repressive activity  
284 of Panx IDR variants mutated for either the LxxLL motif or the five consensus SUMOylation sites  
285 (charge-preserving lysine to arginine mutations; Panx[5KR]), or both together (Figure 5B). Both single  
286 mutant IDR constructs showed substantially reduced silencing ability but were not inert. The double  
287 mutant, however, lost all silencing capacity (Figure 5B; Figure S4B).

288

289 Based on our biochemical and OSC experiments, we set out to genetically uncouple Panx and Sov in  
290 flies (Figure 5C). We generated transgenic fly lines expressing, instead of the endogenous protein,  
291 FLAG-GFP-tagged wildtype Panx, the single mutants Panx[LxxLL-mut] or Panx[5KR], and the double  
292 mutant Panx[LxxLL-mut+5KR]. Western blot analysis of ovarian lysates showed that the tagged proteins

293 were expressed at levels comparable to endogenous Panx, that N-terminal tagging did not interfere with  
294 SUMOylation, and that the 5KR mutation, but not the LxxLL mutation, prevented detectable Panx  
295 SUMOylation (Figure 5D). Individually, the LxxLL mutation and the 5KR mutation had intermediate  
296 (~67% fertile) and substantial (~16% fertile) impact on fertility and transposon repression, respectively  
297 (Figure 5E, F). The double mutant, however, was entirely sterile and phenocopied *panx* null mutants in  
298 terms of transposon de-silencing and the collapsed morphology of laid eggs (Figure 5E, F).

299  
300 We finally tested the Panx–Sov dual-binding model from the side of Sov, which unlike Panx or the  
301 piRNA pathway is required for viability. We hypothesized that the SIM-NTD-SIM unit at the Sov N-  
302 terminus represents a binding module specific for the piRNA pathway. If true, targeted mutations of this  
303 unit should uncouple Sov specifically from the piRNA pathway, yielding viable yet sterile flies. Using  
304 CRISPR-mediated genome engineering, we generated two defined *sov* alleles (Figure 5C). First, the  
305 NTD[2KE] mutant that is unable to bind the Panx LxxLL peptide *in vitro* (Figure 3G) and second, a Sov  
306 variant with point mutations in both SIMs. Females homozygous for the *sov*[NTD\_2KE] allele were  
307 viable and laid eggs yet displayed strongly reduced fertility (egg hatching rate ~15%; Figure 5G). Their  
308 sterility was more severe compared to females expressing Panx[LxxLL-mut] (egg hatching rate ~70%),  
309 suggesting that the Sov NTD binds, besides Panx, to additional client proteins. Flies homozygous for the  
310 *sov*[ $\Delta$ SIM] allele were barely affected in their fertility and ability to silence transposons (Figure 5H, I).  
311 This prompted us to generate Panx–Sov binding deficient flies where the SUMO–SIM interactions were  
312 prevented via the *sov*[ $\Delta$ SIM] allele, and the LxxLL–NTD interaction via the *panx*[LxxLL-mut] allele.  
313 While both alleles individually showed a fertility of ~72% and ~85%, respectively, their combination  
314 resulted in almost complete sterility (hatching rate ~8%), accompanied by strong transposon de-  
315 repression (Figure 5H, I). Our combined data show that Panx engages the general heterochromatin factor  
316 Sov via two distinct molecular interactions, and that their combined action confers strong transcriptional  
317 silencing activity to the Panx IDR, and therefore SFiNX, *in vivo*.

### 318 319 320 **SUMOylation of Panx is coupled to its Piwi-mediated stabilization on chromatin**

321 The 5KR mutation in the IDR prevents Panx SUMOylation *in vivo* and is a strong loss of function allele  
322 despite harboring the Sov-interacting LxxLL motif (Figure 5). We hypothesized that Panx SUMOylation  
323 serves a regulatory function to gate a functional interaction between Panx and Sov. If SUMOylation of

324 Panx would occur only at piRNA target sites, this would allow cells to control the link between piRNA  
325 pathway and general heterochromatin machinery. To test this, we reasoned that piRNA-guided silencing  
326 occurs co-transcriptionally and that nascent target transcripts are attached to chromatin via transcribing  
327 RNA Polymerase II. We therefore separated a whole cell OSCs lysate, in the presence of NEM, into a  
328 soluble fraction (enriched for tubulin) and an insoluble pellet fraction (enriched for histone H3 and  
329 therefore chromatin) (Figure 6A). Western blot analysis showed that the SUMOylated Panx isoforms  
330 were almost exclusively present in the chromatin-enriched pellet fraction, while soluble Panx was non-  
331 modified (Figure 6A). This supported a model where cells restrict SUMOylation of Panx to chromatin.

332  
333 To characterize the genomic binding sites of Panx, we performed ChIP-seq experiments using anti-GFP  
334 antibodies and OSCs expressing endogenously GFP-tagged Panx. Non-tagged cells served as control.  
335 This revealed an enrichment of Panx at piRNA-targeted transposons (e.g. *gypsy*) but not at non-targeted  
336 transposons (e.g. *Doc*; Figure S5A). Similarly, Panx was enriched at genomic regions flanking the 381  
337 piRNA-targeted transposon insertions in OSCs, specifically in the tagged cell line (Figure 6B, C). To our  
338 surprise, Panx was also enriched above background at expressed gene loci (which do not give rise to  
339 piRNA complementary transcripts; Figure S5B). Considering that a substantial fraction of Panx in the  
340 chromatin-enriched fraction was not SUMOylated (Figure 6A), we reasoned that native Panx might be  
341 transiently associated with transcribed loci, possibly through intrinsic sampling of nascent transcripts,  
342 and that Panx becomes stabilized and SUMOylated only at piRNA-targeted loci. To test this, we  
343 performed ChIP-seq experiments with OSCs that were pre-extracted to enrich for more stably chromatin  
344 associated, SUMOylated Panx prior to formaldehyde crosslinking. This resulted in relatively increased  
345 Panx signal at piRNA targeted transposons and genomic regions flanking piRNA-targeted transposon  
346 insertions (Figure 6D, E; Figure S5C), while the signal at transcribed gene loci decreased (Figure S5B  
347 right).

348  
349 To establish a more direct link between Piwi-mediated heterochromatin formation, Panx stabilization on  
350 chromatin, and Panx SUMOylation, we experimentally decreased or increased the levels of Panx engaged  
351 in co-transcriptional silencing. We depleted OSCs of Piwi, which should block stable chromatin  
352 association of Panx at transposon loci, or of HP1, which is required for Piwi-mediated silencing (Iwasaki  
353 et al., 2016; Yu et al., 2015) and whose absence should lead to increased levels of Piwi at derepressed  
354 transposon loci. While piRNA-targeted transposons were de-repressed in both, Piwi as well as HP1

355 depleted cells (Figure 2H, 6I), we observed opposing impacts on Panx SUMOylation (Figure 6F): In  
356 Piwi-depleted cells, Panx SUMOylation was absent and Panx levels in the chromatin enriched fraction  
357 were reduced. In HP1-depleted cells, on the other hand, the fraction of SUMOylated Panx increased, and  
358 all SUMOylated Panx isoforms were again present in the chromatin-enriched fraction (Figure 6F).  
359 Consistent with these findings, Panx occupancy on nearly all piRNA-repressed transposons (e.g. *gypsy*)  
360 and in the genomic regions flanking piRNA-repressed transposon insertions was reduced in OSCs  
361 depleted for Piwi but was increased in OSCs depleted for HP1 (Figure 6G, H, J; Figure S5D-F).  
362 Transposons not targeted by Piwi (e.g. *Doc* or *F*-element) did not show Panx enrichment above  
363 background in either condition (Figure S5F). Taken together, our data support a model where binding of  
364 Piwi-piRNA complexes to complementary nascent transcripts results in SUMOylation and stabilization  
365 of Panx on chromatin, thereby setting the stage for recruiting the heterochromatin machinery specifically  
366 to piRNA target loci.

### 369 **Direct Ubc-9 mediated SUMOylation of Panx is independent of Su(var)2-10**

370 The specific SUMOylation of Panx at piRNA target sites raises the question of how this process is  
371 molecularly controlled. Protein SUMOylation is an ATP dependent reaction that requires the consecutive  
372 action of E1 activating enzyme (Aos1-Uba2 in *Drosophila*) and E2 conjugating enzyme (Lwr/Ubc9 in  
373 *Drosophila*). In most cases, specific E3 ligases stimulate the E2-catalyzed conjugation of SUMO to a  
374 target lysine residue of the substrate (Gareau and Lima, 2010; Geiss-Friedlander and Melchior, 2007;  
375 Jentsch and Psakhye, 2013). We first focused on the E3 Ligase Su(var)2-10, which is genetically required  
376 for Piwi- and Panx-mediated transcriptional silencing and heterochromatin formation (Hari et al., 2001;  
377 Ninova et al., 2020a). The PIAS family protein Su(var)2-10 has been proposed to promote protein-group  
378 SUMOylation at genomic piRNA target loci (Ninova et al., 2020a), thereby creating binding platforms  
379 for heterochromatin effectors (e.g. histone methyltransferases or histone deacetylases) via multiple  
380 SUMO-SIM interactions (Jentsch and Psakhye, 2013). The substrates of Su(var)2-10 in the piRNA  
381 pathway are unknown and we therefore asked whether SUMOylation of Panx depends on Su(var)2-10.  
382 We first examined the dynamics of Panx SUMOylation upon loss of the core SUMO-pathway and  
383 depleted OSCs for Smt3 (Figure 7A). 48 or 72h after siRNA transfection (longer siRNA treatments  
384 resulted in cell death), free Smt3 was barely detectable and overall Smt3-conjugates were reduced. In  
385 line with this, SUMOylated Panx isoforms were reduced (Figure 7A). Unexpectedly however, native

386 Panx levels were also reduced. This was markedly different to Piwi-depleted cells, where Panx  
387 SUMOylation was lost yet native Panx levels were unchanged (Figure 6F), suggesting that the inability  
388 to SUMOylate Panx stabilized at piRNA-target sites leads to its degradation. Upon siRNA-mediated  
389 depletion of the E2 conjugating enzyme Lwr/Ubc9 (Figure S6A), we similarly observed reduced levels  
390 of native Panx and a mild loss of SUMOylated Panx isoforms, especially for the 72h sample (Figure 7B).  
391 In stark contrast, depletion of Su(var)2-10 to nearly undetectable levels resulted in increased Panx  
392 SUMOylation, both 48 and 72h after siRNA transfection, and levels of native Panx were not reduced  
393 (Figure 7C). The observed increase in Panx SUMOylation might result from de-repression of piRNA-  
394 targeted transposons (leading to more Piwi-targeting at chromatin similar to the HP1 depletion) or from  
395 an increased availability of Ubc9-Smt3 conjugates in Su(var)2-10 depleted cells. We concluded that  
396 Su(var)2-10, despite its essential role in Piwi-mediated heterochromatin formation (Ninova et al., 2020a),  
397 is not required for Panx SUMOylation and therefore most likely acts more downstream.

398  
399 Besides Su(var)2-10, only few other E3 SUMO ligases are known, and none of these were identified in  
400 genetic screens for transposon silencing factors. We therefore explored an alternative model: Unlike  
401 protein ubiquitination, where E3 ligases are required for E2-mediated substrate conjugation,  
402 SUMOylation can occur in an E3 independent manner (Gareau and Lima, 2010; Johnson and Blobel,  
403 1997; Rodriguez et al., 2001; Sampson et al., 2001). This requires an accessible SUMOylation consensus  
404 sequence ( $\Psi$ -K-x-D/E) that directly interacts with the substrate binding groove of the E2 conjugating  
405 enzyme Ubc9 (Bernier-Villamor et al., 2002). The Panx IDR contains four  $\Psi$ -K-x-D/E consensus sites.  
406 To test whether Ubc9 can SUMOylate Panx independent of an E3-ligase, we turned to an *in vitro*  
407 SUMOylation assay (Flotho et al., 2012). We purified recombinant *Drosophila* Smt3, the dimeric E1  
408 activating enzyme Aos1-Uba2, the E2 conjugating enzyme Lwr/Ubc9 and the complete SFiNX complex  
409 consisting of full length Panx (Strep-MBP-tagged), the Nxf2-Nxt1 heterodimer, and the Dynein light  
410 chain protein Ctp (Figure 7D; Figure S6B). When incubating all factors together for 1h at 30°C, we  
411 observed SUMOylation of Panx with up to five Smt3 moieties in an ATP, Smt3, and E1/E2 dependent  
412 manner (Figure 7E). In contrast, the SFiNX subunit Nxf2 was not modified, consistent with it lacking  
413 predicted SUMOylation sites and with the absence of higher molecular weight Nxf2 isoforms in OSCs  
414 (Figure 7E ; Figure S6C).

415

416 To substantiate our findings, we tested whether E1/E2-dependent SUMOylation of Panx requires the  
417 targeted lysine residues to reside in the  $\Psi$ -K-x-D/E context. We focused on the IDR, which harbors all  
418 predicted strong SUMOylation consensus sites in Panx. We purified recombinant Panx IDR (aa 1-195)  
419 with a His-HA tag (which lacks lysine residues; Figure 7F). Like full length Panx, the Panx IDR was  
420 readily SUMOylated in an ATP, Smt3, and E1/E2 dependent manner (Figure 7G). In contrast, an IDR  
421 variant where the two central residues within each SUMOylation consensus site were swapped, thereby  
422 resulting in  $\Psi$ -x-K-D/E motifs, was a very poor SUMOylation substrate (Figure 7H). These findings  
423 would support a model where Ubc9 SUMOylates the Panx IDR in an E3-independent manner.

424  
425 Protein SUMOylation can be stimulated by substrate specific E3 ligases, but also through SIMs *in cis*  
426 that coordinate Ubc9-SUMO conjugates proximal to target lysines (Lin et al., 2006; Meulmeester et al.,  
427 2008). Considering that the Sov NTD interacts with the LxxLL motif in the Panx IDR and possesses two  
428 immediately adjacent SIMs, we asked whether the Sov N-terminus might stimulate Panx SUMOylation  
429 *in trans*. Indeed, the Sov NTD flanked by two SIMs stimulated SUMOylation of the Panx IDR *in vitro*  
430 (Figure 7I). Sov NTD variants with only one flanking SIM showed weak stimulatory activity (Figure  
431 S6D). The Sov core NTD without flanking SIMs was unable to stimulate SUMOylation of the Panx IDR,  
432 pointing to a direct involvement of the two SIMs rather than a model where NTD binding opens up the  
433 Panx IDR for optimal SUMOylation (Figure 7I). Similarly, an NTD variant with two flanking SIMs yet  
434 unable to bind the Panx LxxLL motif (2KE mutant), did not stimulate SUMOylation of the Panx IDR  
435 (Figure 7J). To probe whether the stimulatory effect of the Sov N-terminus supports Panx SUMOylation  
436 also in cells, we transfected OSCs with siRNAs targeting *sov*. The extent of Panx SUMOylation was  
437 unchanged in Sov-depleted cells (Figure S6E). This was different compared to HP1-depleted cells, where  
438 SUMOylation of Panx was elevated (Figure 6F). Considering that in both, Sov- and HP1-depleted cells,  
439 transposons were de-repressed to similar extents (Figure 2H), the unchanged SUMOylation of Panx in  
440 Sov-depleted cells might be the consequence of two opposing effects canceling each other out: increased  
441 recruitment of SFiNX to chromatin, yet decreased Panx SUMOylation efficiency in the absence of Sov.  
442 Taken together, our data reveal the elaborate molecular relationship between the Panx IDR and the Sov  
443 N-terminus (Figure S6F). The two-tiered interaction between SFiNX and Sov, which critically depends  
444 on SUMOylation of the Panx IDR by the core SUMO machinery, forms the molecular interface between  
445 the nuclear piRNA pathway and the heterochromatin machinery.

## DISCUSSION

With this work, we uncover the identity and control of the molecular interface between the nuclear piRNA pathway and the cellular heterochromatin machinery in *Drosophila* (Figure 7K). The core of this interface is a direct protein-protein interaction between the piRNA pathway-specific factor Panx and the ubiquitously expressed zinc finger Sov, which is required for general heterochromatin biology. Our central findings are that (1) Piwi-mediated stabilization of Panx at nascent transcripts on chromatin triggers SUMOylation of Panx and (2) that SUMOylation of Panx is critical for its interaction with Sov and thus for target silencing. We propose that induced SUMOylation of the SFiNX co-repressor subunit Panx on chromatin acts as a molecular switch to restrict functional interactions between the piRNA pathway and the general heterochromatin machinery to piRNA target sites.

We started our investigations at the level of SFiNX, the co-repressor complex consisting of Panx, Nxf2–Nxt1 and Ctp that acts at the interface of piRNA pathway and general heterochromatin machinery. Within SFiNX, we identified the N-terminal ~200 amino acid region in Panx as the central and potentially only ‘silencing domain’. In several aspects, this region of Panx, termed IDR, resembles activating domains of transcriptional regulators (Sigler, 1988): it is intrinsically disordered, rich in prolines and, with a  $pK_a$  of 4.2, highly acidic. A common mode of how transcriptional regulators recruit co-activators or co-repressors is via ‘fuzzy’ interactions involving several weak hydrophobic interactions that in sum mediate specific binding (e.g. Tuttle et al., 2018). In the case of the Panx IDR, an amphipathic helix with central LxxLL motif binds directly to an alpha-helical domain (NTD) of the multi-zinc finger protein Sov. Remarkably, the NTD domain of Sov bears clear sequence similarity to a predicted folded domain in Med15, a Mediator subunit that binds to short motifs in transcriptional regulators. This might indicate that the Sov-NTD–LxxLL module was coopted from a binding module previously involved in transcriptional regulation. In isolation, the LxxLL–NTD interaction has an affinity of ~1 micromolar. Given the low abundance of Panx and Sov in cells, this is potentially insufficient for meaningful binding *in vivo*. We find that an additional interaction between Panx and Sov, mediated by SUMOylation of the Panx IDR and two SIMs flanking the Sov NTD, is required for Panx function *in vivo*. Besides strengthening the Panx–Sov interaction, SUMOylation of Panx might also aid in exposing the LxxLL motif in the first place by disrupting intra-IDR interactions between the LxxLL motif and other hydrophobic sites. Consistent with this, strong consensus SUMOylation sites are located adjacent to the LxxLL motif and to a hydrophobic patch at the very N-terminus of the Panx IDR. Also, the 27 residue



477 Panx peptide with LxxLL motif has a stronger silencing capacity (~20-fold) than the full IDR with  
478 mutated SUMOylation sites (~8-fold; Figure 1). These observations are consistent with the LxxLL motif  
479 being partially occluded in the context of the non-SUMOylated Panx IDR.

480  
481 The concept of strengthening or coordinating protein-protein interactions through nearby SUMO-SIM  
482 pairs is a common cellular strategy to temporally and spatially constrain functional interactions between  
483 proteins (Kerscher, 2007). With this in mind, it is noteworthy that SUMOylated Panx isoforms are  
484 detectable only in the chromatin fraction, and that loss of Piwi leads to the absence of Panx  
485 SUMOylation. This suggests a simple model in which Piwi-mediated recruitment and/or stabilization of  
486 SFiNX on chromatin is mechanistically coupled to SUMOylation of Panx, thereby limiting a functional  
487 Panx-Sov interaction to piRNA target loci.

488  
489 A central open question is how SUMOylation of Panx is molecularly restricted to piRNA target sites.  
490 This could be achieved through Piwi-engagement with a target transcript leading to the co-recruitment  
491 of substrate (SFiNX) and the SUMOylation machinery. Alternatively, the core SUMOylation machinery  
492 might be already present at chromatin and only the SFiNX substrate is recruited or stabilized on  
493 chromatin via Piwi. To understand this critical process, knowledge of the entire set of involved proteins  
494 will be required. Our data indicate that Su(var)2-10 is not required for Panx SUMOylation. As Panx  
495 harbors multiple SUMOylation consensus sites embedded in an acidic and intrinsically disordered  
496 polypeptide, it could be a direct Ubc9 substrate (Bernier-Villamor et al., 2002). Consistent with this,  
497 Panx is readily SUMOylated *in vitro* in an E3 independent manner. We note, however, that the  
498 involvement of an as yet unidentified E3 SUMO ligase cannot be ruled out at this stage. Based on our  
499 results, we currently favor a "substrate-to-enzyme" model in which Ubc9 is constitutively present on  
500 chromatin (e.g., at transcribed loci, as shown in Neyret-Kahn et al., 2013) and in which recruitment of  
501 Panx to chromatin, and thus to Ubc9, results in Panx SUMOylation. Consistent with this model, the  
502 isolated Panx IDR, whose silencing activity requires its SUMOylation sites, is a strong silencing domain  
503 independent of other SFiNX subunits or Piwi.

504  
505 While recruitment of the Panx IDR to a reporter locus via DNA tethering results in strong silencing and  
506 heterochromatin formation, its recruitment to a nascent RNA, which mimics the actual *in vivo* situation,  
507 has no measurable effect on reporter expression. This is in stark contrast to the recruitment of full-length

508 Panx, which is a very strong co-transcriptional silencer (Sienski et al., 2015; Yu et al., 2015; Batki et al.,  
509 2019). Such an on/off difference in silencing capacity suggests that the IDR, when recruited in isolation  
510 to a nascent RNA is not capable of establishing a functional interaction with Sov. We therefore propose  
511 that a key function of the structured Panx C-terminus, which interacts with Nxf2–Nxt1 and the  
512 dimerization unit Ctp, is to increase the residence time of the complex on chromatin, allowing for Panx  
513 SUMOylation and thus recruitment of Sov to the locus (Eastwood et al., 2021; Schnabl et al., 2021).

514  
515 The molecular function of Sov in the establishment of heterochromatin at piRNA target loci is unclear.  
516 Its multiple C2H2 zinc fingers and reported interaction with HP1 suggest a role in recruitment and/or  
517 stabilization of HP1, a key factor in heterochromatin initiation and maintenance, on chromatin (Benner  
518 et al., 2019; Jankovics et al., 2018). However, experimental recruitment of HP1 to a nascent reporter  
519 transcript does not result in co-transcriptional silencing (Batki et al., 2019; Sienski et al., 2015),  
520 suggesting that Sov must have additional molecular activities. One of these may be related to Su(var)2-  
521 10, a SUMO E3 ligase of the PIAS family that is required for piRNA-mediated and general  
522 heterochromatin formation (Ninova et al., 2020a; Ninova et al., 2020b). Depletion of Su(var)2-10 in  
523 OSCs resulted in increased Panx SUMOylation. This was similar to depletion of HP1 and therefore places  
524 Su(var)2-10 downstream of the SUMOylation-dependent SFiNX-Sov interaction. We found Su(var)2-  
525 10 enriched in co-immunoprecipitation experiments with tagged Sov but not with tagged Panx (Figure  
526 S3A). E3 Ligases of the PIAS family have been implicated in protein group SUMOylation, where also  
527 accessible lysine residues outside of the  $\Psi$ -K-x-D/E consensus motif are SUMOylated (Jentsch and  
528 Psakhye, 2013; Li et al., 2020). This would create a multi-SUMO binding platform for diverse  
529 heterochromatin effector complexes harboring SIMs, such as the H3K9 methyltransferase Eggless–  
530 Windei (SetDB1–ATF7IP), histone deacetylases or the H3K4 demethylase Su(var)3-3 (Lsd1) (Ninova  
531 et al., 2020a). Accordingly, SUMOylation would play a dual role at piRNA target sites: As a regulatory  
532 switch, it gates the molecular interface between the piRNA pathway and Sov. And as an amplifier, with  
533 the critical role of the E3 SUMO ligase Su(var)2-10, it creates a "molecular glue" that recruits the various  
534 effector complexes whose combined action shuts down the locus through heterochromatin formation.  
535 Because Su(var)2-10 itself harbors SIMs, its initial recruitment, possibly via Sov, could then activate a  
536 feed-forward amplification loop. This model has conceptual parallels to double-stranded DNA damage  
537 repair, in which the initial trigger leads to recruitment of primary factors to the site of DNA damage and

538 subsequently, a cascade of protein-group SUMOylation provides a binding platform for the various  
539 factors required for efficient DNA break repair (Jentsch and Psakhye, 2013).

## 540 **ACKNOWLEDGMENTS**

541 We thank the VBCF core facilities (Protein Technologies, NGS, VDRC) for support and the IMBA Fly  
542 House for generating transgenic and CRISPR-edited fly lines. The GMI/IMBA/IMP Scientific Service  
543 units, especially the Mass Spectrometry unit (Karl Mechtler & team) provided outstanding support. We  
544 thank the Brennecke lab for help throughout this project, and Plamen Batalski for generating amino acid  
545 mapping scripts. Cristopher Lima and Ulrich Hohmann gave valuable feedback on the manuscript. The  
546 Brennecke lab is funded by the Austrian Academy of Sciences, the European Community (ERC-2015-  
547 CoG - 682181), and the Austrian Science Fund (F 4303 and W1207). X-ray diffraction studies were  
548 conducted at the Advanced Photon Source on the Northeastern Collaborative Access Team beamlines,  
549 supported by NIGMS grant P30 GM124165 and U.S. Department of Energy grant DE-AC02-  
550 06CH11357. The Eiger 16M detector on 24-ID-E beamline is funded by a NIH-ORIP HEI grant  
551 (S100D021527). This work was supported in part by the Maloris Foundation (DJP). The Memorial Sloan  
552 Kettering Cancer Center structural biology core facility is supported by National Cancer Institute Core  
553 grant P30-CA008748. C. Yu and M. Gehre are supported by the VIP<sup>2</sup> Post-Doc fellowship program as  
554 part of the EU Horizon 2020 research and innovation program (Marie Skłodowska-Curie grant No.  
555 847548).

## 556 **AUTHOR CONTRIBUTIONS**

557 J.W. undertook X-ray studies on the Sov NTD – Panx LxxLL peptide complex and ITC assays under  
558 supervision of D.J.P. V.I.A. and C.Y. performed all molecular biology experiments, except: J.S.  
559 identified the LxxLL motif and purified recombinant SFiNX complex, J.B., L.T., L.B. and P.D.  
560 performed fly experiments, M.G. performed H3K9me3 Cut&Run experiments and G.S. generated GRO-  
561 Seq data. C.Y., D.H. and C.Y. performed computational analyses, M.N. performed the phylogenetic  
562 analysis of the Panx LxxLL peptide, L.B. established *sov* RNAi lines and the Sov antibody, K.M.  
563 generated OSC cell lines. The project was supervised by J.B. and D.J.P. The paper was written by V.I.A,  
564 C.Y. and J.B. with input from all authors.

## 565 **DECLARATION OF INTERESTS**

566 The authors declare no competing interests.

569 **FIGURE LEGENDS**

570 **Figure 1:**

571 **An amphipathic LxxLL motif in the Panx IDR binds Sov**

572 **A**, Schematic representation of the GFP reporter assay in OSCs that allows for UAS - Gal4-DBD (DNA  
573 binding domain) mediated recruitment of proteins of interest upstream of the reporter transcription start  
574 site (TSS). qPCR amplicon for Figure S1B is indicated.

575 **B**, Boxplots showing GFP reporter levels in OSCs following transfection with plasmids encoding Gal4-  
576 DBD fusions of Panx or the indicated Panx fragments (numbers indicate median fold-change, normalized  
577 to median GFP fluorescence of cells transfected with Gal4-only expressing plasmid in two biological  
578 replicates,  $n = 10,000$ ; box plots indicate median (center line), first and third quartiles (box), whiskers  
579 show  $1.5\times$  interquartile range; outliers were omitted).

580 **C**, Cartoon of the Panx primary sequence, indicating secondary structure elements (black, grey), protein  
581 disorder score (red; based on protein disorder predictor PONDR VSL2) and occurrence of D, E, P  
582 (positive) and K, R (negative) residues (blue line and instances indicated at bottom). IDR (intrinsic  
583 disorder region), NCR (NLS containing region) and structured region are indicated.

584 **D**, To the left, Panx IDR fragments tested in the transcriptional silencing reporter assay are shown. The  
585 protein sequence logo shown below illustrates the pattern of amino acid conservation in the 27 amino  
586 acid peptide surrounding the conserved LxxLL motif (logo based on a multiple sequence alignment of  
587 Panx orthologs of the ‘melanogaster’ subgroup; residues colored by chemical properties- hydrophobic in  
588 black, basic in blue, acidic in red, neutral in purple, and polar in green). To the right: As in panel B, with  
589 indicated Gal4-DBD fusions.

590 **E**, As in panel B, with indicated Gal4-DBD fusions.

591 **F**, Volcano plot showing fold enrichment of proteins determined by quantitative mass spectrometry in  
592 Panx LxxLL-peptide pulldown experiments versus Panx-LxxLL mutant peptide control ( $n = 3$  biological  
593 replicates; p-values corrected for multiple testing; Doblmann et al., 2018).

594 **G**, Volcano plot showing fold enrichment of proteins determined by quantitative mass spectrometry in  
595 GFP-FLAG-Panx co-immunoprecipitates versus control experiments ( $n = 4$  biological replicates; p-  
596 values corrected for multiple testing).

597

598

599

600 **Figure 2:**

601 **Sov is required for Piwi and Panx-mediated heterochromatin formation**

602 **A**, Schematic representation of the GFP silencing reporter in flies, which allows for recruitment of  $\lambda$ N-  
603 tagged proteins to the nascent transcript via boxB sites in the 3' UTR.

604 **B**, Confocal images of early oogenesis stages showing fluorescence levels (greyscale; scale bar: 20 $\mu$ m)  
605 of the ubiquitously expressed GFP reporter with  $\lambda$ N-Panx expressed in all germline cells and additional  
606 germline-specific knockdown (GLKD) against *white* (control; left) or *sov* (right).

607 **C**, Metaplot of H3K9me3 levels (in OSCs) at regions flanking piRNA-targeted transposon insertions  
608 (vertical line) following depletion of Sov as measured by Cut&Run ( $n = 381$  transposon insertions).

609 **D**, Volcano plot showing fold changes in steady state RNA levels of annotated transposons in Sov-  
610 depleted OSCs compared to control (piRNA-repressed transposons marked in yellow;  $n = 3$ ).

611 **E**, Metaplot of Sov-GFP enrichment (in OSCs) at regions flanking piRNA-targeted transposon insertions  
612 (vertical line) determined by ChIP-seq ( $n = 381$  transposon insertions).

613 **F**, Boxplots showing GFP reporter (Fig. 1A) levels in OSCs following transfection with plasmids  
614 encoding a Gal4-DBD fusion of Sov (numbers indicate median fold-change, normalized to median GFP  
615 fluorescence of cells transfected with Gal4-only expressing plasmid in two biological replicates,  $n =$   
616 10,000; box plots indicate median (center line), first and third quartiles (box), whiskers show 1.5 $\times$   
617 interquartile range; outliers were omitted).

618 **G**, H3K9me3 levels at the GFP reporter locus (amplicon indicated in Fig. 1A) after Sov tethering  
619 determined by ChIP-qPCR ( $n = 5$  biological replicates; the gene desert '*kalahari*' served as negative  
620 control; error bars: St. dev. (standard deviation)).

621 **H**, Heatmap showing the fold change of steady state RNA levels (determined by RNA-seq) of annotated  
622 *Drosophila* transposons in OSCs after siRNA-mediated Sov, HP1, Panx or Piwi depletion (depletion  
623 shown by western blot experiments to the left).

624

625 **Figure 3: Structural basis of the Panx-Sov interaction**

626 **A**, Shown is the distribution (along the Sov primary sequence; annotated domain organization at the top)  
627 and relative level of Sov peptides identified by mass spectrometry from a Panx LxxLL peptide pulldown.  
628 The western blot inlay to the right indicates Sov protein integrity upon sonication of nuclear OSC lysate.

629 **B**, Western blot analysis of immunoprecipitation experiments from S2 cells transiently expressing GFP-  
630 Sov (aa 1-118) as bait and wildtype or mutant Gal4-DBD\_FLAG-tagged Panx LxxLL peptide (aa 82-  
631 108) as prey.

632 **C**, Coomassie stained SDS-PAGE showing an *in vitro* pulldown experiment with streptavidin-bound  
633 wildtype or mutant Panx LxxLL peptide and recombinant GFP-tagged Sov NTD fragments as prey  
634 (asterisk indicates a background band from Streptavidin beads).

635 **D**, Isothermal calorimetry measurement of the interaction affinity of the Sov NTD (aa 14-90) with  
636 wildtype (black) or mutant (red) Panx LxxLL peptide (aa 82-108).

637 **E**, Shown are ribbon models of the Sov NTD (aa 14-90; blue) - Panx LxxLL peptide (aa 82-108; gold)  
638 structure with interacting residues in bonds representation (K73 and K80 residues mutated in panel G are  
639 highlighted).

640 **F**, Surface representation of the Sov NTD colored according to electrostatic surface potential (red,  
641 negative; white, neutral; blue, positive) bound to the Panx LxxLL peptide (gold) as ribbon model with  
642 sidechains shown in bonds representation.

643

#### 644 **Figure 4: Panx is SUMOylated**

645 **A**, Hatching rates of eggs laid by females with indicated genotype mated to wildtype males ( $n = 5$ ; error  
646 bars: St. dev.).

647 **B**, Silver stained SDS-PAGE of a pulldown experiment (with denaturing wash steps) using GFP  
648 nanobodies and ovarian lysate from GFP-Smt3 expressing flies or control flies.

649 **C**, Unique peptide counts of indicated proteins identified by mass spectrometry in the pulldown  
650 experiment shown in panel B.

651 **D, E**, Western blot analysis of ovary lysates (panel D) or OSC lysate (panel E) probed with an  $\alpha$ -Panx  
652 antibody (asterisk indicates an unspecific band; native Panx runs at ~100 kDa despite a molecular weight  
653 of 61 kDa).

654 **F**, Western blots showing GFP-Trap immunoprecipitation experiments with lysates from wildtype (WT)  
655 OSCs or OSCs expressing endogenously GFP-FLAG-tagged Panx (Inp: input; IP: immuno-precipitate).  
656 The band at ~70 kDa in the  $\alpha$ -FLAG western represents an N-terminal Panx degradation product.

657 **G**, Western blots showing a pulldown experiment using indicated recombinant GFP-tagged Sov NTD  
658 variants as bait and nuclear OSC lysate as input.

659

660 **Figure 5: A SUMOylation-dependent dual mode interaction between Panx and Sov**  
661 **A**, RT-qPCR analysis showing fold changes in steady state RNA levels of indicated transposons in OSCs  
662 transiently overexpressing GFP-tagged Sov NTD including or excluding the flanking SIMs ( $n = 3$   
663 biological replicates; error bars: St. dev.).  
664 **B**, Boxplots of GFP intensity in OSCs expressing the transcriptional silencing reporter (Fig. 1A)  
665 following transfection with plasmids encoding Gal4-DBD fusions of the indicated Panx IDR variants  
666 (numbers indicate median fold-change, normalized to median GFP fluorescence of cells transfected with  
667 Gal4-only expressing plasmid in two biological replicates,  $n = 10,000$ ; box plots indicate median (center  
668 line), first and third quartiles (box), whiskers show  $1.5\times$  interquartile range; outliers were omitted).  
669 **C**, Schematic representation of the SUMOylation-dependent dual interaction between Panx IDR and Sov  
670 N-terminus (identity of used Panx and Sov mutants is indicated).  
671 **D**, Western blot showing levels and SUMOylation extent of endogenous Panx or GFP-tagged Panx  
672 rescue variants expressed in fly ovaries of indicated genotype (asterisk: unspecific band).  
673 **E**, Hatching rates of eggs laid by females with indicated *panx* genotype mated to wildtype males ( $n = 5$   
674 biological replicates; data from a common experiment with Fig. 4A; error bars: St. dev.).  
675 **F**, RT-qPCR analysis showing fold changes in steady state RNA levels of indicated transposons in  
676 ovaries from flies of indicated genotype ( $n = 3$  biological replicates; error bars: St. dev.).  
677 **G, H**, Hatching rates of eggs laid by females with indicated genotype mated to wildtype males ( $n = 3$  or  
678 4 biological replicates; error bars: St. dev.)  
679 **I**, RT-qPCR analysis showing fold changes in steady state RNA levels of indicated transposons in ovaries  
680 from flies of indicated genotype ( $n = 3$  biological replicates; error bars: St. dev.).

681  
682 **Figure 6: SUMOylation of Panx is coupled to its Piwi-mediated stabilization on chromatin**  
683 **A**, Western blot analysis of soluble and insoluble (chromatin-enriched) fractions from OSCs.  
684 **B**, Meta profiles of GFP-Panx enrichment at genomic regions flanking piRNA-targeted transposon  
685 insertions (vertical line) in OSCs, determined by anti-GFP ChIP-seq using OSCs expressing  
686 endogenously GFP-FLAG-tagged Panx ( $n = 381$  transposon insertions).  
687 **C**, Heatmap corresponding to the meta profile in panel B. Transposon insertions were ranked by  
688 H3K9me3 signal intensity in genomic regions flanking the insertions (left).  
689 **D**, As in panel B, but ChIP experiment used pre-extracted OSCs as input.  
690 **E**, Heatmap corresponding to meta profile in panel D.



691 **F**, Western blot analysis of whole cell, soluble and insoluble (chromatin-enriched) fractions from OSCs  
692 depleted for indicated factors via siRNA transfections.

693 **G**, Occupancy of Panx on the *gypsy* transposon, determined via ChIP-seq using pre-extracted OSCs  
694 depleted for indicated factors.

695 **H**, Meta profile of GFP-Panx enrichment at genomic regions flanking piRNA-targeted transposon  
696 insertions (vertical line) in OSCs depleted for indicated factors, determined by anti-GFP ChIP-seq using  
697 pre-extracted OSCs expressing endogenously GFP-FLAG-tagged Panx ( $n = 381$  transposon insertions;  
698 GFP Ctrl. from a common experiment with panel D).

699 **I**, Heatmap showing GRO-seq signal at genomic regions flanking 381 piRNA-targeted transposon  
700 insertions (vertical line) in OSCs depleted for indicated factors.

701 **J**, Heatmap corresponding to meta profile in panel H (transposon insertion coordinates ranked by GRO-  
702 Seq signal after Piwi depletion).

703

704 **Figure 7: Direct Panx SUMOylation by Ubc9, independent of Su(var)2-10 and enhanced by Sov**

705 **A**, Western blot analysis showing depletion of Smt3 and the associated decrease in SUMOylated proteins  
706 as well as SUMOylated and native Panx in OSCs.

707 **B**, Western blot analysis showing changes in SUMOylated and native Panx in OSCs depleted for  
708 Lwr/Ubc9.

709 **C**, Western blot analysis showing the depletion of Su(var)2-10 and the associated changes in the level of  
710 SUMOylated Panx in OSCs.

711 **D**, Coomassie-stained SDS-PAGE showing recombinant full length SFiNX complex composed of  
712 TwinStrep-MBP-Panx, His6-Ctp, Nxf2 and Nxt1).

713 **E**, Western blot analysis of *in vitro* SUMOylation assay with full length SFiNX complex as substrate.

714 **F**, Coomassie-stained SDS-PAGE of recombinant WT and 5XK mutant Panx IDR-3xHA-His10.

715 **G**, Western blot analysis of *in vitro* SUMOylation assay with WT Panx IDR as a substrate.

716 **H**, Western blot analysis showing *in vitro* SUMOylation efficiencies (increasing concentration of Smt3)  
717 of WT and 5XK mutant Panx IDR.

718 **I**, Western blot analysis showing the enhancement of Panx IDR *in vitro* SUMOylation by the Sov NTD  
719 in a SIM-dependent manner.

720 **J**, Western blot analysis showing the enhancement of Panx IDR *in vitro* SUMOylation by the Sov NTD  
721 in a LxxLL binding-dependent manner.

722 **K**, Schematic model summarizing the identity and regulation of the molecular interface between piRNA  
723 pathway (SFiNX) and general heterochromatin machinery (Sov).

724 **SUPPLEMENTAL FIGURE TITLES AND LEGENDS**

725 **Figure S1 (related to Figure 1)**

726 **A**, Western blot analysis showing expression levels of indicated Gal4-DBD fusion proteins following  
727 transient transfection in OSCs (Ponceau S levels indicate protein loading; related to Fig. 1B).

728 **B**, H3K9me3 levels (normalized to heterochromatic *light* locus) at the reporter locus (amplicon indicated  
729 in Fig. 1A) determined by ChIP-qPCR from OSCs expressing indicated Gal4-DBD fusion proteins ( $n = 2$   
730 biological replicates; error bars: St. dev.).

731 **C**, Western blot analysis showing expression levels of Gal4-DBD fusion proteins with indicated Panx  
732 IDR fragments (amino acid boundaries indicated). Ponceau S levels indicate protein loading; related to  
733 Fig. 1D.

734 **D**, Western blot analysis showing expression levels of Gal4-DBD fusions with indicated WT and LxxLL  
735 mutant Panx fragments. Ponceau S levels indicate protein loading; related to Fig. 1E.

736  
737 **Figure S2 (related to Figure 2)**

738 **A**, Confocal image of egg chambers with indicated germline-specific knockdown (GLKD) stained for  
739 Sov (greyscale; scale bar: 20  $\mu\text{m}$ ).

740 **B**, H3K9me3 Cut&Run signal from OSCs with indicated knockdowns at indicated transposons (The *Doc*  
741 retroelement serves as a control transposon as it is not targeted by the piRNA pathway in OSCs).

742 **C**, Sov-GFP ChIP-Seq signal at indicated transposons from OSCs expressing Sov-GFP or not (control)  
743 (The *Doc* retroelement serves as a control transposon as it is not targeted by the piRNA pathway in  
744 OSCs).

745 **D**, Western blot analysis showing expression of Gal4-DBD-FLAG-Sov following plasmid transfection  
746 in the OSC reporter cell line (related to Figure 2F, G).

747  
748 **Figure S3 (related to Figure 4)**

749 **A**, Volcano plot showing fold enrichment of proteins determined by quantitative mass spectrometry in  
750 GFP-FLAG-Sov co-immunoprecipitates versus control ( $n = 3$  biological replicates; p-values corrected  
751 for multiple testing).

752 **B**, Confocal image of egg chamber expressing GFP-Smt3 (greyscale) under the *smt3* regulatory control  
753 elements (scale bar: 20  $\mu\text{m}$ ).

754

755 **Figure S4 (related to Figure 5)**

756 **A**, Western blot analysis showing expression of indicated GFP-FLAG tagged Sov NTD variants  
757 following transient transfection in OSCs (related to Figure 5A).

758 **B**, Western blot analysis showing expression levels of Gal4-DBD-FLAG fusions with indicated Panx  
759 IDR variants following transient transfection in the OSC reporter line. Staining with Ponceau S serves as  
760 loading control (related to Figure 5B).

761  
762 **Figure S5 (related to Figure 6)**

763 **A**, GFP-Panx ChIP-Seq signal from OSCs expressing GFP-Panx or not (control) at *gypsy* (piRNA  
764 targeted) or *Doc* transposons (not targeted).

765 **B**, Heatmap of GRO-seq signal (left), GFP-Panx ChIP-Seq signal (middle) and Chromatin-enriched  
766 GFP-Panx ChIP-Seq signal (right) around transcription start sites (TSSs) of expressed genes in OSCs (all  
767 heatmaps sorted for maximal GRO-seq signal at the TSS; plots above heatmaps depict the corresponding  
768 meta-profiles).

769 **C**, GFP-Panx ChIP-Seq signal from pre-extracted OSCs expressing GFP-Panx or not (control) at *gypsy*  
770 (piRNA targeted) or *Doc* transposons (not targeted).

771 **D**, Meta profiles of GFP-Panx ChIP-seq enrichment at genomic regions flanking piRNA-targeted  
772 transposon insertions ( $n = 381$  transposon insertions; GFP Ctrl. from a common experiment with Figure  
773 6B).

774 **E**, Heatmap corresponding to meta profile shown in panel D.

775 **F**, GFP-Panx ChIP-Seq signal from pre-extracted OSCs with indicated knockdowns and expressing GFP-  
776 Panx or not (control) at indicated piRNA-targeted (*gypsy*, *17.6*, *Stalker2*, *mdg1*) or not targeted  
777 transposons (*Doc*, *F*-element).

778 **G**, Heatmap of GFP-Panx ChIP-Seq signal at TSSs of expressed genes in OSCs depleted for the indicated  
779 factors.

780  
781 **Figure S6 (related to Figure 7)**

782 **A**, Transcript levels of *lwr*, measured by RT-qPCR with two amplicons, following siRNA transfection  
783 ( $n = 2$  biological replicates).

784 **B**, Coomassie-stained SDS-PAGE showing recombinant *Drosophila* Uba2/His6-Aos1, Lwr and Smt3  
785 used in the *in vitro* SUMOylation assays.

786 **C**, Western blot analysis showing endogenous Nxf2 protein in OSC whole cell lysate prepared with or  
787 without N-ethylmaleimide (NEM). Staining with Ponceau S serves as loading control.

788 **D**, Western blot analysis showing impact of increasing concentration of Sov NTD variants lacking SIM1  
789 or SIM2 on the efficiency of Panx IDR *in vitro* SUMOylation.

790 **E**, Western blot analysis showing extent of endogenous Panx SUMOylation in OSCs depleted for Sov  
791 with two different siRNAs.

792 **F**, Cartoon model of how the Panx–Sov-NTD interaction enhances Panx SUMOylation.

793

## 794 MATERIALS AND METHODS

### 795 Fly strains

796 All fly strains used in this study are listed in Supplementary Table 2 and are available from the VDRC  
797 (<http://stockcenter.vdrc.at/control/main>). Flies used for fertility scoring and ovary analysis were aged for  
798 4 days at 25°C on apple juice agar with yeast paste before analysis. *panx* rescue strains were generated  
799 as previously described (Batki et al., 2019). For mutagenesis of the two SIMs in *sov* two pairs of sgRNAs  
800 (1+4 and 3+2) were cloned into pCFD4d (Addgene 83954) (Ge et al., 2016) as described (Port et al.,  
801 2014). A 1kb fragment of the N-terminus with modified SIM domains and guide target sites was  
802 synthesized (Genewiz) and amplified by PCR with two primer pairs to yield a shorter (750bp) and a  
803 longer (980bp) product. Both PCR products were mixed in equimolar amounts, denatured and reannealed  
804 (Dokshin et al., 2018). Two pCFD4d plasmids (each at 40ng/ $\mu$ l) expressing four different sgRNAs were  
805 co-injected with 100ng/ $\mu$ l Hsp70-Cas9 (Addgene 45945) (Gratz et al., 2013) and 100ng/ $\mu$ l of the hybrid  
806 dsDNA donor into white embryos. Flies containing the desired nucleotide changes were identified by  
807 PCR and subsequent Sanger sequencing. For the generation of the double K73E K80E (2KE) *sov* mutant  
808 two guides (Supplementary Table 3) were cloned into pDCC6 (Addgene 59985) and co-injected with an  
809 AltR HDR donor oligo (IDT) into white embryos as described (Gokcezade et al., 2014). F2 flies were  
810 screened by PCR and subsequent Sanger sequencing to identify those with the desired nucleotide  
811 changes. The boxB-GFP sensor was inserted into attP33 (Markstein et al., 2008) and recombined with  
812 the UASP- $\lambda$ N-HA-Panx transgene in attP40. The resulting boxB-GFP sensor UASP- $\lambda$ N-HA-Panx stock  
813 was combined with the *sov* or *white* sh-RNA transgenes (Ni et al., 2011) on the third chromosome, and  
814 crossed to the MTD-Gal4 driver line.

### 815 OSC culture and siRNA transfection

816 OSCs were cultured as previously described (Niki et al., 2006; Saito et al., 2009). For plasmid DNA and  
817 siRNA transfections, Cell Line Nucleofector Kit V (Amaxa Biosystems) was used with program T-029.  
818  $5 \times 10^6$  cells were used per transfection with 250 pmol siRNA duplexes (Supplementary Table 4).

### 819 Generation of endogenously tagged OSC cell lines

820  
821 Panx was N-terminally tagged at its endogenous locus with an HDR cassette consisting of a puromycin-  
822 resistance gene followed by a P2A cleavage site linked to FLAG-GFP. For Sov C-terminal tagging, the  
823 order of the puromycin-resistance gene and FLAG-GFP were reversed. The HDR cassette was flanked  
824

825 by ~500-bp homology arms around the start codon and stop codon in *panx* and *sov* respectively and  
826 cloned into a pBluescriptII SK (+) backbone. 2500 ng of purified HDR PCR product and 1500 ng of  
827 guide RNA expression plasmid (Addgene 49330) containing the relevant guide RNAs (Supplementary  
828 Table 3) were transfected into  $5 \times 10^6$  OSCs. 24 h post transfection puromycin-containing medium (5  
829  $\mu\text{g}/\text{mL}$ ) was added to the cells and resistant clones were allowed to grow for 10 days. Individual clones  
830 were picked and analyzed by PCR, western blot and FACS for successful integration of the tagging  
831 cassette.

832

### 833 **Reporter tethering assay**

834 The GFP reporter tethering assay in OSCs was carried out as described (Batki et al., 2019). In brief, CDS  
835 fragments of interest were cloned into the entry Gal4 tethering vector (Addgene 128013-128014) and the  
836 resulting plasmids were electroporated into OSCs, followed by treatment with puromycin to enrich for  
837 the transfected population. 4 days after transfection, cells were analyzed by flow cytometry on a FACS  
838 BD LSR Fortessa (BD Biosciences). Transfected cells were gated using mCherry expression and GFP  
839 fluorescence was measured for the population (10,000 cells per experiment). Data analysis was carried  
840 out in FlowJo (FlowJo, LLC).

841

### 842 **Immunofluorescence staining of ovaries**

843 5-10 ovary pairs were dissected into ice-cold PBS and fixed in immunofluorescence Fixing Buffer (4 %  
844 formaldehyde, 0.3 % Triton X-100, PBS) for 20 minutes at room temperature with rotation. Fixed ovaries  
845 were then washed 3 times with PBX (0.3 % Triton X-100, 1x PBS), and blocked in BBX (0.1 % BSA, 0.3  
846 % Triton X-100, 1x PBS) for 30 min at room temperature. The samples were incubated with primary  
847 antibody in BBX overnight at 4°C with rotation, followed by 3 in PBX and an overnight incubation with  
848 secondary antibody in BBX at 4°C with rotation. After rinsing with PBX, samples were stained for 5 min  
849 with  $0.1 \mu\text{g}.\text{mL}^{-1}$  DAPI and washed 3 times with PBX. Ovaries were resuspended in  $\sim 50 \mu\text{l}$  DAKO  
850 Fluorescence mounting medium and imaged on a Zeiss LSM-880 Axio Imager confocal microscope. For  
851 GFP reporter imaging ovaries were washed with PBX after fixation and stained with  $0.1 \mu\text{g}.\text{mL}^{-1}$  DAPI  
852 followed by 3 washed with PBX. Ovaries were resuspended in  $\sim 20 \mu\text{L}$  VectaShield mounting medium,  
853 imaged on a Zeiss LSM-880 Axio Imager confocal microscope equipped with AiryScan detector and the  
854 resulting images processed using FIJI/ImageJ (Schindelin et al., 2012). Antibodies are listed in  
855 Supplementary Table 5.

## 856 **Generation of Sov and Su(var)2-10 antibodies**

857 Purified His6-tagged Sov (aa 90-297) was used to generate the anti-Sov monoclonal antibody used for  
858 western blot and immunofluorescence. For Su(var)2-10, we raised a monoclonal antibody against the  
859 His6-tagged region corresponding to amino acids 2–514. Su(var)2-10 and Sov mouse monoclonal  
860 antibodies were generated by the Max F. Perutz Laboratories Monoclonal Antibody Facility.

## 861 **Whole cell extract preparation and subcellular fractionation**

862 For whole cell extracts (WCE) cells were washed once with PBS and resuspended in ice-cold WCE  
863 buffer (10 mM Tris-HCl, 1% NP-40, 2 mM MgCl<sub>2</sub>, benzonase, cComplete Protease Inhibitor Cocktail  
864 (Roche), 25 nM NEM where relevant) for 15 min on ice. After protein concentration measurement, the  
865 lysates were boiled with 1x final concentration SDS-PAGE loading buffer at 95 °C for 3 min. For  
866 subcellular fractionation the cell pellet was resuspended in CSK buffer (10 mM HEPES-KOH, pH 7.3,  
867 300 mM sucrose, 0.5 % Triton X-100, 100 mM NaCl, 3 mM MgCl<sub>2</sub>, 25 nM N-ethylmaleimide (NEM),  
868 cComplete Protease Inhibitor Cocktail (Roche)) for 4 minutes on ice followed by centrifugation at 2500  
869 × g for 5 min at 4 °C. The supernatant was transferred to a new tube and further centrifuged at 20,000 ×  
870 g for 15 min at 4 °C to remove cellular debris and kept as the soluble fraction. The pellet was washed  
871 once in CSK buffer, resuspended in WCE buffer, and then boiled in 1x final concentration SDS-PAGE  
872 loading buffer at 95 °C for 3min. All fractions were prepared in the same volume as the WCE samples.  
873

## 874 **Western blotting**

875 Proteins were separated by SDS polyacrylamide gel electrophoresis and transferred to 0.2 μm  
876 nitrocellulose membrane (Bio-Rad). Protein transfer and equal loading were checked by staining with  
877 Ponceau S. The membrane was blocked with 5 % non-fat milk in PBX (PBS, 0.05 % Triton X-100).  
878 Following blocking, the membranes were incubated with primary antibodies overnight at 4 °C or for 1  
879 hour at room temperature. After primary antibody incubation the membrane was washed 3 times with  
880 PBX for 5 min followed by incubation with HRP-conjugated secondary antibodies in 5 % milk in PBX  
881 for 1 hour at room temperature. The membrane was then washed 3 times for 5 minutes with PBX,  
882 incubated with Clarity Western ECL Blotting Substrate (Bio-Rad) and imaged with a ChemiDoc MP  
883 imager (Bio-Rad). Antibodies are listed in Supplementary Table 5.  
884



### 887 **Protein co-immunoprecipitation from S2 cell lysates**

888  $8 \times 10^6$  S2 cells were transfected with 2  $\mu$ g plasmids encoding FLAG- and GFP-tagged fragments of  
889 interest from Panx and Sov respectively using Cell Line Nucleofector Kit V (Amaxa Biosystems) with  
890 program G-030. 2 days after transfection, cells were collected, washed once with cold PBS and  
891 resuspended in S2 lysis buffer (50 mM Tris-HCl pH 7.5, 150 mM NaCl, 0.5 % Triton X-100, 10 %  
892 glycerol, 1 mM DTT, cOmplete Protease Inhibitor Cocktail (Roche)). After incubation for 30 min on ice  
893 the cell lysate was centrifuged (20,000  $\times$  g for 15 min at 4 °C) and the supernatant was collected. Magnetic  
894 agarose GFP-Trap beads (ChromoTek) were incubated with the lysate for 2 hours at 4 °C with nutation.  
895 Subsequently, the beads were washed 3 x for 10 min with S2 lysis buffer, boiled in 2x SDS-PAGE  
896 loading buffer for 5 minutes at 95 °C and the eluate analyzed by western blotting.

### 897 **co-immunoprecipitation of SUMOylated proteins with denaturing wash step from fly ovaries**

898 FLAG-GFP-Smt3 expressing and wild type control flies were dissected and 200  $\mu$ L of ovaries were  
899 washed once with ice-cold PBS and dounced (40 times) in 1 mL ovary lysis buffer (OLB) (50 mM Tris-  
900 HCl pH 8, 150 mM NaCl, 0.25 % Triton X-100, 0.3 % NP-40, 10 % glycerol, 2 mM MgCl<sub>2</sub>, 25 mM N-  
901 ethylmaleimide (NEM), cOmplete Protease Inhibitor Cocktail (Roche)). The ovary lysate was incubated  
902 for 30 min at 4 °C with nutation and centrifuged for 5 min at 20,000  $\times$  g at 4 °C. The supernatant was  
903 kept on ice and the pellet was resuspended in 200  $\mu$ L OLB with 500 mM NaCl and sonicated for 10 min  
904 at high setting with 30 s / 30 s duty cycle on a Bioruptor sonicator (Diagenode) and centrifuged for 5 min  
905 at 20,000  $\times$  g at 4 °C. The supernatant from this step was combined with the supernatant from the previous  
906 step and centrifuged for 5 min at 20,000  $\times$  g at 4 °C. The resulting supernatant was pre-cleared by  
907 incubation with Sepharose beads for 30 min at 4 °C and centrifuged for 5 min at 20,000  $\times$  g at 4 °C. The  
908 supernatant was extracted with a syringe to bypass the lipid layer on top and mixed with OLB pre-  
909 equilibrated magnetic agarose GFP-Trap beads (ChromoTek) followed by overnight incubation at 4 °C.  
910 The beads were washed once with OLB for min 10 min at 4 °C, once with RIPA buffer (10 mM Tris-  
911 HCl pH 8 150 mM NaCl, 0.5 mM EDTA, 0.1 % SDS, 1 % NP-40, 1% sodium deoxycholate) for min 10  
912 min at 4 °C followed by a single wash with high salt wash buffer (10 mM Tris-HCl pH 8, 1M NaCl, 0.1  
913 % NP-40) for min 10 min at 4 °C and then 2 washes with SDS urea wash buffer (10 mM Tris-HCl pH 8,  
914 1 % SDS, 8 M urea) for min 10 min at room temperature. Beads were further processed for downstream  
915 mass spectrometry analysis and a small aliquot boiled in 2x SDS-PAGE loading buffer at 95 °C for 5  
916 min and analyzed by SDS-PAGE followed by silver staining (Pierce Silver stain Kit, #24612).

## 918 **Recombinant protein pulldown and co-immunoprecipitation from OSC extracts**

919  $5 \times 10^8$  OSCs were washed in PBS and resuspended in ice-cold CSK buffer (10 mM HEPES-KOH pH  
920 7.3, 300 mM sucrose, 0.5 % Triton X-100, 100 mM NaCl, 3 mM MgCl<sub>2</sub>, 25 nM N-ethylmaleimide  
921 (NEM), cOmplete Protease Inhibitor Cocktail (Roche)) and incubated for 5 min on ice followed by  
922 centrifugation at  $2500 \times g$  for 5 min at 4 °C. The pellet was resuspended in RIPA buffer (50 mM HEPES-  
923 KOH, pH 7.3, 200 mM KCl, 3.2 mM MgCl<sub>2</sub>, 0.25 % Triton X-100, 0.25 % NP-40, 0.1 % sodium  
924 deoxycholate, 10 % glycerol, benzonase, 25 mM NEM) and incubated for 1 hour at 4 °C with nutation.  
925 The lysate was centrifuged at  $18,000 \times g$  for 10 min at 4 °C and supernatant was collected for either  
926 pulldowns or co-immunoprecipitation. For recombinant protein pulldown, GFP-tagged variants of the  
927 Sov NTD were immobilized on magnetic agarose GFP-Trap beads (ChromoTek) by incubation in PBS  
928 with 0.1 % Triton X-100 for 3 hours at 4 °C. The GFP-fusion pre-coupled beads were incubated with  
929 OSC extract for 3 hours at 4 °C with nutation. The beads were washed 3 x for 10 min at 4 °C with RIPA  
930 buffer and associated proteins were eluted by boiling in 2x SDS-PAGE loading buffer for 5 min at 95  
931 °C. The eluate was analyzed by western blotting. For co-immunoprecipitation, the extract prepared from  
932 OSC lines expressing endogenously tagged proteins of interest was incubated with magnetic GFP-Trap  
933 agarose (Chromotek) for 3h at 4°C. The beads were washed 3 x with RIPA buffer for 10 min at 4 °C,  
934 followed by 3 x washes with non-detergent buffer (20 mM HEPES pH 7.4, 137 mM NaCl). 80% of the  
935 washed beads were resuspend in 100mM ammonium bicarbonate and used for mass spectrometry  
936 analysis. 20% of the beads-associated proteins were eluted in 2x SDS-PAGE loading buffer by incubating  
937 at 95°C for 5 min. The eluate was analyzed by silver staining.

## 938 **Peptide pulldowns**

939 Peptides corresponding to Panx aa 82-108 (WT LxxLL and mutant NxxQQ) were chemically synthesized  
940 with an aminohexanoate linked N-terminal biotin moiety and a C-terminal amide blocking group.  
941 Peptides were precoupled to streptavidin magnetic beads (Pierce) in PBS with 0.1 % Triton X-100 for 3  
942 hours at 4 °C. For nuclear extract pulldown,  $5 \times 10^8$  OSCs were resuspended in hypotonic buffer (10 mM  
943 Tris-HCl pH 7.5, 2 mM MgCl<sub>2</sub>, 3 mM CaCl<sub>2</sub>, 1 mM DTT, cOmplete EDTA-free protease inhibitor  
944 cocktail (Roche)) for 10 min at 4 °C followed by centrifugation ( $500 \times g$  for 5 min at 4 °C). The pellet  
945 was resuspended in hypotonic lysis buffer (10 mM Tris-HCl pH 7.5, 2 mM MgCl<sub>2</sub>, 3 mM CaCl<sub>2</sub>, 0.5 %  
946 Igepal CA-630, 10 % glycerol, 1 mM DTT, cOmplete EDTA-free protease inhibitor cocktail (Roche))  
947 and incubated for 20 min at 4 °C. After centrifugation, the resulting nuclear pellet was resuspended in  
948

949 nuclear lysis buffer (20 mM HEPES-KOH, pH 7.9, 150 mM NaCl, 0.3 % Triton X-100, 0.25 % NP-40,  
950 10 % glycerol, 1 mM DTT, cOmplete EDTA-free protease inhibitor cocktail (Roche)) and incubated with  
951 nutation for 30 min at 4 °C. For Sov peptide mapping, the nuclear extract was sonicated for 15 min at  
952 high intensity (30s/30s duty cycle); Bioruptor sonicator (Diagenode)). After lysate centrifugation (20,000  
953 × g for 15 min at 4 °C), the supernatant was collected and incubated for 3 hours at 4 °C with the peptide  
954 pre-coupled beads. Beads were washed 3 x in nuclear lysis buffer, followed by detergent-free wash step  
955 and sent for mass spectrometry analysis. For *in vitro* binding assays, peptides were coupled to magnetic  
956 streptavidin beads (Pierce) and incubated with recombinant Sov fragments in peptide binding buffer (50  
957 mM Tris-HCl pH 7.5, 150 mM NaCl, 10 % glycerol, 0.5 % Triton X-100) for 3 hours at 4 °C followed  
958 by 3 washes for 10 min in the same buffer. Beads were boiled in 2x SDS-PAGE loading buffer for 5 min  
959 at 95 °C and the eluate was analyzed by SDS-PAGE followed by Coomassie staining.

### 960 961 **Recombinant Sov fragment purification for pulldown assays**

962 Sov fragments of interest were cloned in a pET15b bacterial expression vector carrying a C-terminal  
963 GFP His6 tag. Transformed *E. coli* strain BL21(DE3) were grown at 37 °C until OD<sub>600</sub> reached 0.8 then  
964 the culture was cooled down to 18 °C and induced with 0.1 mM IPTG for 18 hours. Cell pellets were  
965 resuspended in NTD lysis buffer (50 mM sodium phosphate, pH 8, 200 mM NaCl, 0.1 % Triton X-100,  
966 10% glycerol, 10 mM imidazole, 5 mM β-mercaptoethanol, 1 mM PMSF) and passed twice through a  
967 French press followed by ultracentrifugation at 100,000 × g for 1 hour at 4 °C. The supernatant was  
968 passed through a 5 ml HisTrap HP column (Cytiva, #17524801) and bound protein was eluted in a  
969 gradient with NTD lysis buffer containing 500 mM imidazole and no Triton X-100. Fractions containing  
970 the fragment of interest were pooled and diluted to a final concentration of 50 mM NaCl and ran through  
971 HiTrap Q anion exchange column (Cytiva, #17115401) followed by elution in 50 mM Tris pH 8 with a  
972 linear 50-500 mM NaCl gradient. Fractions of interest were pooled and concentrated on a 15 kDa MWCO  
973 spin concentrator (Sartorius, #VS2001) and were then loaded onto a Superdex 75 gel filtration column  
974 (GE Healthcare, #28-9893-33) (equilibrated in 50 mM Tris pH 8 and 150 mM NaCl). Fractions  
975 containing the protein of interest were pooled, aliquoted and stored at -80 °C.

### 976 977 **Recombinant IDR and SFiNX complex purification**

978 Panx IDR (aa 1-195) was cloned in a pET21a bacterial expression vector with a C-terminal 3xHA-His10  
979 tag and transformed into *E. coli* strain BL21(DE3). Bacteria were grown at 37 °C until OD<sub>600</sub> reached 0.8

980 and then induced by 1 mM IPTG for 2 hours at 37 °C. The bacterial pellet was resuspended in IDR lysis  
981 buffer (50 mM sodium phosphate, pH 8, 300 mM NaCl, 10 mM imidazole) and freeze-thawed with the  
982 addition of 5 mM  $\beta$ -mercaptoethanol and 1 mM phenylmethylsulfonyl fluoride. The cell suspension was  
983 passed twice through a French press and then ultracentrifuged at 100,000  $\times$  g for 1 hour at 4 °C. The  
984 supernatant was passed through a 5 ml HisTrap HP column (Cytiva, #17524801) and bound protein was  
985 eluted in a gradient with IDR lysis buffer containing 500 mM imidazole. Fractions that contained the  
986 IDR were pooled and diluted to a final concentration of 50 mM NaCl and passed through HiTrap Q anion  
987 exchange column (Cytiva, #17115401) followed by elution in 50 mM Tris pH 7.5 with a linear 50-500  
988 mM NaCl gradient. Fractions containing the protein of interest were pooled and concentrated on a 5 kDa  
989 MWCO spin concentrator (Cytiva, #28-9323-59). Urea was added to a final concentration of 8M  
990 followed by overnight dialysis against transport buffer (20 mM HEPES, pH 7.3, 110 mM potassium  
991 acetate, 2 mM magnesium acetate, 1 mM EGTA, 1 mM DTT). The protein was then loaded onto a  
992 transport buffer equilibrated Superdex 75 gel filtration column (GE Healthcare, #28-9893-33) and  
993 fractions containing the protein of interest were pooled, aliquoted and stored at -80 °C. Full length SFiNX  
994 was purified as described (Schnabl et al., 2021) with the exception that size exclusion chromatography  
995 was performed with a HiLoad 16/60 Superose 6 column (Cytiva, #29323952).

### 996 997 **RNA preparation and RT-qPCR**

998 5-10 million OSCs or 5–10 pairs of ovaries were collected, and total RNA was isolated using NucleoSpin  
999 RNAXS kit (Macherey-Nagel) according to the manufacturer's instructions. Complementary DNA was  
1000 prepared using 1  $\mu$ g total RNA and random hexamer oligonucleotides with SuperScript IV Reverse  
1001 Transcriptase (Invitrogen). Primers used for qPCR analysis are listed in Supplementary Table 6.

### 1002 1003 **RNA-seq and RNA-seq analysis**

1004 For RNA-seq libraries, total RNA was isolated with TRIzol reagent, and poly(A)+ RNA was enriched  
1005 with Dynabeads Oligo(dT)25 (Thermo Fisher, 61002) according to the user manual. cDNA was prepared  
1006 with NEBNext Ultra II RNA First and Second Strand Synthesis Module, followed by library preparation  
1007 with NEBNext Ultra II DNA Library Prep Kit Illumina (NEB). The library was sequenced on HiSeqV4  
1008 (Illumina) in SR50 mode. RNA-seq analysis and differential gene expression analysis were carried out  
1009 as described (Batki et al., 2019).

## ChIP-seq

ChIP was performed according to (Lee et al., 2006) with modifications, except for H3K9me3 ChIP after Sov-tethering, which was performed using ultra-low-input micrococcal nuclease-based native ChIP (ULI-NChIP) according to (Brind'Amour et al., 2015). For ChIP after pre-extracting cells, OSCs were first treated on ice with CSK buffer (10 mM HEPES-KOH, pH 7.3, 300 mM sucrose, 0.5 % Triton X-100, 100 mM NaCl, 3 mM MgCl<sub>2</sub>, 25 nM N-ethylmaleimide (NEM), cOmplete Protease Inhibitor Cocktail (Roche)) for 5 min before crosslinking; otherwise, OSCs were directly crosslinked with 1% formaldehyde for 10min at RT, the reaction was quenched with glycine (final concentration of 125mM) and cells were washed twice with cold 1x PBS. Chromatin was prepared using lysis buffer (50 mM Tris-HCl, pH 8.0, 2 mM EDTA, 0.5% NP-40, 10% Glycerol, 1× protease inhibitors), followed by sonication in sonication buffer (20 mM Tris-HCl, pH 8.0, 150 mM NaCl, 2 mM EDTA, 0.2% SDS, 1× protease inhibitors) with Covaris E220 sonicator for 6 min (Duty Factor 5.0, Peak Incident Power 140, Cycles per Burst 200). Protein G and Protein A Dynabeads (1:1 mixed) were blocked with 1mg/ml denatured yeast tRNA (Sigma-Aldrich, R5636) and 1mg/ml of BSA (NEB, B9000S) for 2h at 4 °C, and then anti-GFP antibody (Thermo Scientific, A-111222) or anti H3K9me3 antibody (Active Motif, 39161) were coupled to the blocked Dynabeads for 2h at 4 °C. The antibody-coupled beads were then added to the sheared chromatin and incubated overnight at 4 °C. Beads were washed with wash buffer 1 (20 mM Tris-HCl, pH 8.0, 500 mM NaCl, 2 mM EDTA, 0.5% NP-40, 0.1% SDS) and wash buffer 2 (10 mM Tris-HCl, pH 8.0, 250 mM LiCl, 1 mM EDTA, 0.5% NP-40, 0.5% Na-Deoxycholate), followed by elution with elution buffer (0.1M NaHCO<sub>3</sub>, 1% SDS). Eluates and inputs were de-crosslinked at 65 °C overnight. Following RNase A and proteinase K treatment, DNA was purified via Phenol/Chloroform extraction. ChIP-seq libraries were prepared using NEBNext Ultra DNA Library Prep Kit Illumina (NEB) and sequenced on HiSeqV4 (Illumina) in SR50 mode.

## ChIP-seq analysis

ChIP-seq analysis was carried out as described (Batki et al., 2019). In brief, after removal of the adaptors, sequencing reads with a minimal length of 18 nt were mapped to the *D. melanogaster* genome (dm6) using Bowtie (Langmead, B., et al. 2009, PMID: 19261174) (release v.1.2.2), with zero mismatch allowed for genome wide analysis. For the TE-consensus analysis, reads were mapped allowing '0' mismatches and multi-mapping only within a single transposon. BigWig files were generated using Homer (Heinz et al., 2010) and UCSC BigWig tools (Kent et al., 2010). Heatmaps were generated with

1042 Deeptools (Ramirez et al., 2016) using BigWig files with uniquely mapped reads, and meta profiles were  
1043 generated with ngs.plot (Shen et al., 2014) using bam files with uniquely mapped reads. The Piwi-  
1044 regulated TEs were used as in (Sienski et al., 2015). All sequenced libraries are listed in Supplementary  
1045 Table 7 and are accessible via GEO (accession #GSE173237).

## 1047 **Mass spectrometry**

1048 Mass spectrometry was carried out as described (Batki et al., 2019).

## 1050 ***In vitro* SUMOylation assay**

1051 Coding sequences for Aos1, Uba2, Lwr and Smt3 were cloned from *Drosophila* cDNA. E1, E2 and Smt3  
1052 protein expression and purification was carried out as described in (Flotho et al., 2012). *In vitro*  
1053 SUMOylation reactions were assembled in SUMOylation assay buffer (20 mM HEPES, pH 7.3, 110 mM  
1054 potassium acetate, 2 mM magnesium acetate, 1 mM EGTA, 1 mM DTT, 0.05 % Tween-20, 20  $\mu$ g/mL  
1055 BSA) with 150 nM His-Aos1/Uba2, 500 nM Lwr, 2  $\mu$ M Smt3 (unless stated otherwise). Additional  
1056 proteins added to the reaction mix were dialyzed overnight against transport buffer (20 mM HEPES, pH  
1057 7.3, 110 mM potassium acetate, 2 mM magnesium acetate, 1 mM EGTA, 1 mM DTT) to avoid dilution  
1058 effects on reaction kinetics. 20  $\mu$ L reactions were assembled on ice and initiated by the addition of 5  
1059 mM ATP, incubated for 1 hour at 30 °C and terminated with 20  $\mu$ L 2x SDS-PAGE loading buffer  
1060 followed by western blot analysis.

## 1062 **Cut&Run**

1063 Cut&Run was performed according to (Skene et al., 2018) with minor modifications. In brief, OSCs were  
1064 harvested and 500.000 OSCs were washed three times and coupled to 10  $\mu$ l of activated Concanavalin  
1065 A-coated magnetic beads (Polysciences, #86057-3) per sample. Cells were gently lysed using Dig-wash  
1066 buffer (20 mM HEPES pH 7.3, 150 mM NaCl, 0.5 mM spermidine, 0.01% digitonin, cOmplete Protease  
1067 Inhibitor (Roche)) and incubated with 0.5  $\mu$ g of H3K9me3 (Active motif, #39161) or IgG (CST, #2729S)  
1068 antibody at 4°C overnight on a nutator. Cells were washed and resuspended in Dig-wash  
1069 buffer containing 700 ng/ml pAG-MNase (in-house production by Molecular Biology Facility) and  
1070 incubated for 2 hours at 4°C on a nutator. After washing, cells were resuspended in Dig-wash  
1071 buffer containing 2 mM CaCl<sub>2</sub> to activate pAG-MNase. MNase activity was quenched by the addition of  
1072 2x STOP Buffer (340 mM NaCl, 20 mM EDTA, 4 mM EGTA, 0.02% Digitonin, 50  $\mu$ g/ml RNase A, 50

1073  $\mu\text{g/ml}$  Glycogen). DNA fragments were released into solution by incubating samples at  $37^\circ\text{C}$  mixing  
1074 at 500 rpm for 10 minutes. Insoluble material was pelleted by centrifugation and 0.1% SDS and  
1075  $0.2 \mu\text{g}/\mu\text{l}$  Proteinase K were added to the supernatant followed by incubation for 1 hour at  $55^\circ\text{C}$ . DNA  
1076 was purified using a DNA purification kit (in house) and libraries were prepared following the  
1077 manufacturer's instructions with NEBNext Ultra II DNA Library Prep Kit for Illumina using a shortened  
1078 elongation time of 15 seconds during PCR amplification. Sequencing was performed on  
1079 a NextSeq550 using 75 bp single-end mode.

1080

### 1081 **Cut&Run Data Analysis**

1082 Cut&Run sequencing reads were aligned to the *D. melanogaster* reference genome (dm6 assembly)  
1083 using Bowtie2 (Galaxy v. 2.3.4.3, Langmead et al. 2012) with zero mismatches allowed. Only non-  
1084 duplicated, uniquely mapped reads were retained for further analysis. Plots to visualize the distribution  
1085 of H3K9me3 density around Piwi-regulated transposon insertion sites (Sienski et al., 2015) were  
1086 generated using ngs.plot. The standard error of mean (SEM) across the regions was calculated and shown  
1087 as a semi-transparent shade around the mean curve. (v.2.61) (Shen et al., 2014). For transposon  
1088 consensus analysis, genome mapping reads longer than 23 nt were mapped to transposon consensus  
1089 sequences using STAR (Dobin et al., 2013) (v.2.5.2b; settings: --outSAMmode NoQS --  
1090 readFilesCommand cat --alignEndsType Local --twopassMode Basic --outReadsUnmapped Fastx --  
1091 outMultimapperOrder Random --outSAMtype SAM --outFilterMultimapNmax 1000 --  
1092 winAnchorMultimapNmax 2000 --outFilterMismatchNmax 3 --seedSearchStartLmax 30 --  
1093 outFilterType BySJout --alignSJoverhangMin 15 --alignSJDBoverhangMin 1). Multiple mappings were  
1094 only allowed within one transposon and read counts were divided equally to the mapping positions. For  
1095 plotting, read counts were normalized to 10 million sequenced reads, converted to bedgraph tracks using  
1096 Bedtools (v.2.27.1) (Quinlan and Hall, 2010) and plotted in RStudio as a smoothed conditional means  
1097 function using the loess method (ggplot2 version 3.3.0); semi-transparent shade depict data points  
1098 without smoothing.

1099

### 1100 **GRO-Seq**

1101 GRO-Seq was performed as described in (Sienski et al., 2012).

1102

1103

## 1104 **Protein expression and purification for crystallography**

1105 *D. melanogaster* Panoramix (residues 83-109) and Sov (residues 14-90) were cloned into a modified  
1106 RSFduet-1 vector (Novagen) with an N-terminal His<sub>6</sub>-SUMO tag on Panx and no tag on Sov. Panx and  
1107 Sov were co-expressed in *E. coli* strain BL21(DE3) RIL (Stratagene). The cells were grown at 37°C until  
1108 OD<sub>600</sub> reached 0.8, then the media was cooled to 16°C and IPTG was added to a final concentration of  
1109 0.35 mM to induce protein expression overnight at 16°C. The cells were harvested by centrifugation at  
1110 4°C and disrupted by sonication in Binding buffer (20 mM Tris-HCl pH 8.0, 500 mM NaCl, 20 mM  
1111 imidazole) supplemented with 1 mM PMSF (phenylmethylsulfonyl fluoride) and 3 mM β-  
1112 mercaptoethanol. After centrifugation, the supernatant containing complexes of Panx and Sov was loaded  
1113 onto 5 ml HisTrap Fastflow column (GE Healthcare). After extensive washing with Binding buffer, the  
1114 complex was eluted with Binding buffer supplemented with 500 mM imidazole. The His<sub>6</sub>-SUMO tag  
1115 was removed by Ulp1 protease digestion during dialysis against Binding buffer and separated by  
1116 reloading onto HisTrap column. The flow-through fraction was further purified by HiTrap Q FF column  
1117 and Superdex 75 16/60 column (GE Healthcare). The pooled fractions were concentrated to 20 mg/ml in  
1118 crystallization buffer (20 mM Tris-HCl pH 7.5, 200 mM NaCl, 1 mM DTT). For the seleno-methionine  
1119 (SeMet) derivative protein, the cells were grown in M9 medium supplemented with lysine, threonine,  
1120 phenylalanine, leucine, isoleucine, valine, and Se-methionine and purified as described above.

## 1121 **Crystallization, data collection and structure determination**

1122 Crystals of native and SeMet derivative Panx–Sov complex were grown from the same solutions  
1123 containing 0.1 M CHES pH 9.5, 30% (w/v) PEG 3000 using the sitting drop vapor diffusion method at  
1124 20°C. For data collection, the crystals were flash frozen (100 K) and collected on NE-CAT beam lines  
1125 24ID-C and 24ID-E at the Advanced Photo Source (APS), Argonne National Laboratory. The diffraction  
1126 data were processed with XDS (Kabsch, 2010) and iMosflm (Battye et al., 2011). The structure of the  
1127 Panx-Sov complex was solved by the single-wavelength anomalous diffraction (SAD) method using  
1128 PHENIX (Adams et al., 2002). The automatic model building was carried out using the program PHENIX  
1129 AutoBuild (Adams et al., 2002). The resulting model was completed manually using COOT (Emsley et  
1130 al., 2010) and PHENIX refinement (Adams et al., 2002). The statistics of the diffraction and refinement  
1131 data are summarized in Supplementary Table 8. Molecular graphics were generated with the PyMOL  
1132 program (<https://pymol.org/2/>) and UCSF Chimera X (Goddard et al., 2018).



1135 **Isothermal Titration Calorimetry (ITC)**

1136 His-SUMO tagged Panx peptides and C-terminal His tagged Sov protein were purified separately in the  
1137 same buffer (20 mM Tris pH7.5, 150 mM NaCl, 2 mM  $\beta$ -mercaptoethanol). The titrations were  
1138 performed on a MicroCal ITC200 calorimeter at 20°C. The exothermic heat of reaction was measured  
1139 by 20 sequential injections of 0.72 mM His-SUMO tagged Panx peptides into 30  $\mu$ M Sov protein  
1140 solutions with 120 s interval spacing. The data was fitted using the program Origin with ‘one set of sites’  
1141 model.

1142

1143 **Conservation analysis of the Panx LxxLL motif**

1144 Panx orthologous proteins from the melanogaster species group (taxid 32346; 19 species) were obtained  
1145 from the NCBI nr protein database and aligned using mafft v7 with default settings. A segment  
1146 corresponding to aminoacids in 82-108 Dmel panx was extracted, visualized using clustalx and used to  
1147 derive a sequence logo using ggseqlogo (v0.1 in R3.6.2).

1148

1149 **Data and code availability statement**

1150 Coordinates and structure factors of Sov NTD in complex with the Panx LxxLL peptide were deposited  
1151 in the Protein Data Bank (PDB; accession 7MKK. Sequencing data sets were deposited in the NCBI  
1152 GEO archive (accession GSE173237). The proteomics data were deposited in the ProteomeXchange  
1153 Consortium via the PRIDE partner repository (data set PXD025437). All custom code not referenced in  
1154 the methods is available upon request.

## 1155 REFERENCES

- 1156 Adams, P.D., Grosse-Kunstleve, R.W., Hung, L.W., Ioerger, T.R., McCoy, A.J., Moriarty, N.W., Read,  
1157 R.J., Sacchettini, J.C., Sauter, N.K., and Terwilliger, T.C. (2002). PHENIX: building new software for  
1158 automated crystallographic structure determination. *Acta crystallographica Section D, Biological  
1159 crystallography* 58, 1948-1954.
- 1160 Allshire, R.C., and Madhani, H.D. (2018). Ten principles of heterochromatin formation and function.  
1161 *Nature reviews Molecular cell biology* 19, 229-244.
- 1162 Batki, J., Schnabl, J., Wang, J., Handler, D., Andreev, V.I., Stieger, C.E., Novatchkova, M.,  
1163 Lampersberger, L., Kauneckaitė, K., Xie, W., *et al.* (2019). The nascent RNA binding complex SFiNX  
1164 licenses piRNA-guided heterochromatin formation. *Nature structural & molecular biology* 26, 720-731.
- 1165 Battye, T.G., Kontogiannis, L., Johnson, O., Powell, H.R., and Leslie, A.G. (2011). iMOSFLM: a new  
1166 graphical interface for diffraction-image processing with MOSFLM. *Acta crystallographica Section D,  
1167 Biological crystallography* 67, 271-281.
- 1168 Benner, L., Castro, E.A., Whitworth, C., Venken, K.J.T., Yang, H., Fang, J., Oliver, B., Cook, K.R., and  
1169 Lerit, D.A. (2019). *Drosophila* Heterochromatin Stabilization Requires the Zinc-Finger Protein Small  
1170 Ovary. *Genetics* 213, 877-895.
- 1171 Bernier-Villamor, V., Sampson, D.A., Matunis, M.J., and Lima, C.D. (2002). Structural basis for E2-  
1172 mediated SUMO conjugation revealed by a complex between ubiquitin-conjugating enzyme Ubc9 and  
1173 RanGAP1. *Cell* 108, 345-356.
- 1174 Brennecke, J., Aravin, A.A., Stark, A., Dus, M., Kellis, M., Sachidanandam, R., and Hannon, G.J. (2007).  
1175 Discrete Small RNA-Generating Loci as Master Regulators of Transposon Activity in *Drosophila*. *Cell*  
1176 128, 1089-1103.
- 1177 Brind'Amour, J., Liu, S., Hudson, M., Chen, C., Karimi, M.M., and Lorincz, M.C. (2015). An ultra-low-  
1178 input native ChIP-seq protocol for genome-wide profiling of rare cell populations. *Nature  
1179 communications* 6, 6033.
- 1180 Cox, D.N., Chao, A., and Lin, H. (2000). *piwi* encodes a nucleoplasmic factor whose activity modulates  
1181 the number and division rate of germline stem cells. *Development* 127, 503-514.
- 1182 Czech, B., Munafo, M., Ciabrelli, F., Eastwood, E.L., Fabry, M.H., Kneuss, E., and Hannon, G.J. (2018).  
1183 piRNA-Guided Genome Defense: From Biogenesis to Silencing. *Annual review of genetics* 52, 131-157.
- 1184 Czech, B., Preall, J.B., McGinn, J., and Hannon, G.J. (2013). A Transcriptome-wide RNAi Screen in the  
1185 *Drosophila* Ovary Reveals Factors of the Germline piRNA Pathway. *Molecular cell* 50, 749-761.
- 1186 Dobin, A., Davis, C.A., Schlesinger, F., Drenkow, J., Zaleski, C., Jha, S., Batut, P., Chaisson, M., and  
1187 Gingeras, T.R. (2013). STAR: ultrafast universal RNA-seq aligner. *Bioinformatics* 29, 15-21.
- 1188 Doblmann, J., Dusberger, F., Imre, R., Hudecz, O., Stanek, F., Mechtler, K., and Durnberger, G. (2018).  
1189 apQuant: Accurate Label-Free Quantification by Quality Filtering. *J Proteome Res.*
- 1190 Dokshin, G.A., Ghanta, K.S., Piscopo, K.M., and Mello, C.C. (2018). Robust Genome Editing with Short  
1191 Single-Stranded and Long, Partially Single-Stranded DNA Donors in *Caenorhabditis elegans*. *Genetics*  
1192 210, 781-787.
- 1193 Donertas, D., Sienski, G., and Brennecke, J. (2013). *Drosophila* Gtsfl is an essential component of the  
1194 Piwi-mediated transcriptional silencing complex. *Genes & development* 27, 1693-1705.

- 1195 Eastwood, E.L., Jara, K.A., Bornelov, S., Munafo, M., Frantzis, V., Kneuss, E., Barbar, E.J., Czech, B.,  
1196 and Hannon, G.J. (2021). Dimerisation of the PICTS complex via LC8/Cut-up drives co-transcriptional  
1197 transposon silencing in *Drosophila*. *Elife* 10.
- 1198 Emsley, P., Lohkamp, B., Scott, W.G., and Cowtan, K. (2010). Features and development of Coot. *Acta*  
1199 *crystallographica Section D, Biological crystallography* 66, 486-501.
- 1200 Fabry, M.H., Ciabrelli, F., Munafo, M., Eastwood, E.L., Kneuss, E., Falciatori, I., Falconio, F.A.,  
1201 Hannon, G.J., and Czech, B. (2019). piRNA-guided co-transcriptional silencing coopts nuclear export  
1202 factors. *Elife* 8.
- 1203 Fedoroff, N.V. (2012). Presidential address. Transposable elements, epigenetics, and genome evolution.  
1204 *Science* 338, 758-767.
- 1205 Flotho, A., Werner, A., Winter, T., Frank, A.S., Ehret, H., and Melchior, F. (2012). Recombinant  
1206 reconstitution of sumoylation reactions in vitro. *Methods in molecular biology* 832, 93-110.
- 1207 Gareau, J.R., and Lima, C.D. (2010). The SUMO pathway: emerging mechanisms that shape specificity,  
1208 conjugation and recognition. *Nature reviews Molecular cell biology* 11, 861-871.
- 1209 Ge, D.T., Tipping, C., Brodsky, M.H., and Zamore, P.D. (2016). Rapid Screening for CRISPR-Directed  
1210 Editing of the *Drosophila* Genome Using white Coconversion. *G3* 6, 3197-3206.
- 1211 Geiss-Friedlander, R., and Melchior, F. (2007). Concepts in sumoylation: a decade on. *Nature reviews*  
1212 *Molecular cell biology* 8, 947-956.
- 1213 Goddard, T.D., Huang, C.C., Meng, E.C., Pettersen, E.F., Couch, G.S., Morris, J.H., and Ferrin, T.E.  
1214 (2018). UCSF ChimeraX: Meeting modern challenges in visualization and analysis. *Protein Sci* 27, 14-  
1215 25.
- 1216 Gokcezade, J., Sienski, G., and Duchek, P. (2014). Efficient CRISPR/Cas9 Plasmids for Rapid and  
1217 Versatile Genome Editing in *Drosophila*. *G3*.
- 1218 Gratz, S.J., Cummings, A.M., Nguyen, J.N., Hamm, D.C., Donohue, L.K., Harrison, M.M., Wildonger,  
1219 J., and O'Connor-Giles, K.M. (2013). Genome engineering of *Drosophila* with the CRISPR RNA-guided  
1220 Cas9 nuclease. *Genetics* 194, 1029-1035.
- 1221 Grewal, S.I. (2010). RNAi-dependent formation of heterochromatin and its diverse functions. *Current*  
1222 *opinion in genetics & development* 20, 134-141.
- 1223 Grewal, S.I., and Moazed, D. (2003). Heterochromatin and epigenetic control of gene expression.  
1224 *Science* 301, 798-802.
- 1225 Hari, K.L., Cook, K.R., and Karpen, G.H. (2001). The *Drosophila* Su(var)2-10 locus regulates  
1226 chromosome structure and function and encodes a member of the PIAS protein family. *Genes &*  
1227 *development* 15, 1334-1348.
- 1228 Heinz, S., Benner, C., Spann, N., Bertolino, E., Lin, Y.C., Laslo, P., Cheng, J.X., Murre, C., Singh, H.,  
1229 and Glass, C.K. (2010). Simple combinations of lineage-determining transcription factors prime cis-  
1230 regulatory elements required for macrophage and B cell identities. *Molecular cell* 38, 576-589.
- 1231 Iwasaki, Y.W., Murano, K., Ishizu, H., Shibuya, A., Iyoda, Y., Siomi, M.C., Siomi, H., and Saito, K.  
1232 (2016). Piwi Modulates Chromatin Accessibility by Regulating Multiple Factors Including Histone H1  
1233 to Repress Transposons. *Molecular cell* 63, 408-419.

- 1234 Jankovics, F., Bence, M., Sinka, R., Farago, A., Bodai, L., Pettko-Szandtner, A., Ibrahim, K., Takacs, Z.,  
1235 Szarka-Kovacs, A.B., and Erdelyi, M. (2018). *Drosophila* small ovary gene is required for transposon  
1236 silencing and heterochromatin organization, and ensures germline stem cell maintenance and  
1237 differentiation. *Development* 145.
- 1238 Janssen, A., Colmenares, S.U., and Karpen, G.H. (2018). Heterochromatin: Guardian of the Genome.  
1239 *Annual review of cell and developmental biology* 34, 265-288.
- 1240 Jentsch, S., and Psakhye, I. (2013). Control of nuclear activities by substrate-selective and protein-group  
1241 SUMOylation. *Annual review of genetics* 47, 167-186.
- 1242 Johnson, E.S., and Blobel, G. (1997). Ubc9p is the conjugating enzyme for the ubiquitin-like protein  
1243 Smt3p. *The Journal of biological chemistry* 272, 26799-26802.
- 1244 Kabsch, W. (2010). Integration, scaling, space-group assignment and post-refinement. *Acta*  
1245 *crystallographica Section D, Biological crystallography* 66, 133-144.
- 1246 Kent, W.J., Zweig, A.S., Barber, G., Hinrichs, A.S., and Karolchik, D. (2010). BigWig and BigBed:  
1247 enabling browsing of large distributed datasets. *Bioinformatics* 26, 2204-2207.
- 1248 Kerscher, O. (2007). SUMO junction-what's your function? New insights through SUMO-interacting  
1249 motifs. *EMBO reports* 8, 550-555.
- 1250 Le Thomas, A., Rogers, A.K., Webster, A., Marinov, G.K., Liao, S.E., Perkins, E.M., Hur, J.K., Aravin,  
1251 A.A., and Toth, K.F. (2013). Piwi induces piRNA-guided transcriptional silencing and establishment of  
1252 a repressive chromatin state. *Genes & development* 27, 390-399.
- 1253 Lee, T.I., Johnstone, S.E., and Young, R.A. (2006). Chromatin immunoprecipitation and microarray-  
1254 based analysis of protein location. *Nature protocols* 1, 729-748.
- 1255 Li, C., McManus, F.P., Plutoni, C., Pascariu, C.M., Nelson, T., Alberici Delsin, L.E., Emery, G., and  
1256 Thibault, P. (2020). Quantitative SUMO proteomics identifies PIAS1 substrates involved in cell  
1257 migration and motility. *Nature communications* 11, 834.
- 1258 Lin, D.Y., Huang, Y.S., Jeng, J.C., Kuo, H.Y., Chang, C.C., Chao, T.T., Ho, C.C., Chen, Y.C., Lin, T.P.,  
1259 Fang, H.I., *et al.* (2006). Role of SUMO-interacting motif in Daxx SUMO modification, subnuclear  
1260 localization, and repression of sumoylated transcription factors. *Molecular cell* 24, 341-354.
- 1261 Markstein, M., Pitsouli, C., Villalta, C., Celniker, S.E., and Perrimon, N. (2008). Exploiting position  
1262 effects and the gypsy retrovirus insulator to engineer precisely expressed transgenes. *Nature genetics* 40,  
1263 476-483.
- 1264 Martienssen, R., and Moazed, D. (2015). RNAi and heterochromatin assembly. *Cold Spring Harb*  
1265 *Perspect Biol* 7, a019323.
- 1266 Meulmeester, E., Kunze, M., Hsiao, H.H., Urlaub, H., and Melchior, F. (2008). Mechanism and  
1267 consequences for paralog-specific sumoylation of ubiquitin-specific protease 25. *Molecular cell* 30,  
1268 610-619.
- 1269 Muerdter, F., Guzzardo, P.M., Gillis, J., Luo, Y., Yu, Y., Chen, C., Fekete, R., and Hannon, G.J. (2013).  
1270 A Genome-wide RNAi Screen Draws a Genetic Framework for Transposon Control and Primary piRNA  
1271 Biogenesis in *Drosophila*. *Molecular cell* 50, 736-748.

- 1272 Mugat, B., Nicot, S., Varela-Chavez, C., Jourdan, C., Sato, K., Basyuk, E., Juge, F., Siomi, M.C.,  
1273 Pelisson, A., and Chambeyron, S. (2020). The Mi-2 nucleosome remodeler and the Rpd3 histone  
1274 deacetylase are involved in piRNA-guided heterochromatin formation. *Nature communications* *11*, 2818.
- 1275 Murano, K., Iwasaki, Y.W., Ishizu, H., Mashiko, A., Shibuya, A., Kondo, S., Adachi, S., Suzuki, S.,  
1276 Saito, K., Natsume, T., *et al.* (2019). Nuclear RNA export factor variant initiates piRNA-guided co-  
1277 transcriptional silencing. *The EMBO journal* *38*, e102870.
- 1278 Neyret-Kahn, H., Benhamed, M., Ye, T., Le Gras, S., Cossec, J.C., Lapaquette, P., Bischof, O.,  
1279 Ouspenskaia, M., Dasso, M., Seeler, J., *et al.* (2013). Sumoylation at chromatin governs coordinated  
1280 repression of a transcriptional program essential for cell growth and proliferation. *Genome research* *23*,  
1281 1563-1579.
- 1282 Ni, J.Q., Zhou, R., Czech, B., Liu, L.P., Holderbaum, L., Yang-Zhou, D., Shim, H.S., Tao, R., Handler,  
1283 D., Karpowicz, P., *et al.* (2011). A genome-scale shRNA resource for transgenic RNAi in *Drosophila*.  
1284 *Nature methods* *8*, 405-407.
- 1285 Niki, Y., Yamaguchi, T., and Mahowald, A.P. (2006). Establishment of stable cell lines of *Drosophila*  
1286 germ-line stem cells. *Proceedings of the National Academy of Sciences of the United States of America*  
1287 *103*, 16325-16330.
- 1288 Ninova, M., Chen, Y.A., Godneeva, B., Rogers, A.K., Luo, Y., Fejes Toth, K., and Aravin, A.A. (2020a).  
1289 Su(var)2-10 and the SUMO Pathway Link piRNA-Guided Target Recognition to Chromatin Silencing.  
1290 *Molecular cell* *77*, 556-570 e556.
- 1291 Ninova, M., Fejes Toth, K., and Aravin, A.A. (2019). The control of gene expression and cell identity by  
1292 H3K9 trimethylation. *Development* *146*.
- 1293 Ninova, M., Godneeva, B., Chen, Y.A., Luo, Y., Prakash, S.J., Jankovics, F., Erdelyi, M., Aravin, A.A.,  
1294 and Fejes Toth, K. (2020b). The SUMO Ligase Su(var)2-10 Controls Hetero- and Euchromatic Gene  
1295 Expression via Establishing H3K9 Trimethylation and Negative Feedback Regulation. *Molecular cell*  
1296 *77*, 571-585 e574.
- 1297 Ohtani, H., Iwasaki, Y.W., Shibuya, A., Siomi, H., Siomi, M.C., and Saito, K. (2013). DmGTSF1 is  
1298 necessary for Piwi-piRISC-mediated transcriptional transposon silencing in the *Drosophila* ovary. *Genes*  
1299 *& development* *27*, 1656-1661.
- 1300 Onishi, R., Sato, K., Murano, K., Negishi, L., Siomi, H., and Siomi, M.C. (2020). Piwi suppresses  
1301 transcription of Brahma-dependent transposons via Maelstrom in ovarian somatic cells. *Sci Adv* *6*.
- 1302 Osumi, K., Sato, K., Murano, K., Siomi, H., and Siomi, M.C. (2019). Essential roles of Winderi and  
1303 nuclear monoubiquitination of Eggless/SETDB1 in transposon silencing. *EMBO reports* *20*, e48296.
- 1304 Ozata, D.M., Gainetdinov, I., Zoch, A., O'Carroll, D., and Zamore, P.D. (2018). PIWI-interacting RNAs:  
1305 small RNAs with big functions. *Nature reviews Genetics*.
- 1306 Pichler, A., Fatouros, C., Lee, H., and Eisenhardt, N. (2017). SUMO conjugation - a mechanistic view.  
1307 *Biomol Concepts* *8*, 13-36.
- 1308 Plevin, M.J., Mills, M.M., and Ikura, M. (2005). The LxxLL motif: a multifunctional binding sequence  
1309 in transcriptional regulation. *Trends in biochemical sciences* *30*, 66-69.

- 1310 Port, F., Chen, H.M., Lee, T., and Bullock, S.L. (2014). Optimized CRISPR/Cas tools for efficient  
1311 germline and somatic genome engineering in *Drosophila*. *Proceedings of the National Academy of*  
1312 *Sciences of the United States of America* *111*, E2967-2976.
- 1313 Quinlan, A.R., and Hall, I.M. (2010). BEDTools: a flexible suite of utilities for comparing genomic  
1314 features. *Bioinformatics* *26*, 841-842.
- 1315 Ramirez, F., Ryan, D.P., Gruning, B., Bhardwaj, V., Kilpert, F., Richter, A.S., Heyne, S., Dundar, F.,  
1316 and Manke, T. (2016). deepTools2: a next generation web server for deep-sequencing data analysis.  
1317 *Nucleic acids research* *44*, W160-165.
- 1318 Rodriguez, M.S., Dargemont, C., and Hay, R.T. (2001). SUMO-1 conjugation in vivo requires both a  
1319 consensus modification motif and nuclear targeting. *The Journal of biological chemistry* *276*, 12654-  
1320 12659.
- 1321 Rozhkov, N.V., Hammell, M., and Hannon, G.J. (2013). Multiple roles for Piwi in silencing *Drosophila*  
1322 transposons. *Genes & development* *27*, 400-412.
- 1323 Saito, K., Inagaki, S., Mituyama, T., Kawamura, Y., Ono, Y., Sakota, E., Kotani, H., Asai, K., Siomi, H.,  
1324 and Siomi, M.C. (2009). A regulatory circuit for piwi by the large Maf gene traffic jam in *Drosophila*.  
1325 *Nature* *461*, 1296-1299.
- 1326 Saito, K., Nishida, K.M., Mori, T., Kawamura, Y., Miyoshi, K., Nagami, T., Siomi, H., and Siomi, M.C.  
1327 (2006). Specific association of Piwi with rasiRNAs derived from retrotransposon and heterochromatic  
1328 regions in the *Drosophila* genome. *Genes & development* *20*, 2214-2222.
- 1329 Sampson, D.A., Wang, M., and Matunis, M.J. (2001). The small ubiquitin-like modifier-1 (SUMO-1)  
1330 consensus sequence mediates Ubc9 binding and is essential for SUMO-1 modification. *The Journal of*  
1331 *biological chemistry* *276*, 21664-21669.
- 1332 Schindelin, J., Arganda-Carreras, I., Frise, E., Kaynig, V., Longair, M., Pietzsch, T., Preibisch, S.,  
1333 Rueden, C., Saalfeld, S., Schmid, B., *et al.* (2012). Fiji: an open-source platform for biological-image  
1334 analysis. *Nature methods* *9*, 676-682.
- 1335 Schnabl, J., Wang, J., Hohmann, U., Gehre, M., Batki, J., Andreev, V.I., Purkhauer, K., Fasching, N.,  
1336 Duchek, P., Novatchkova, M., *et al.* (2021). Molecular principles of Piwi-mediated cotranscriptional  
1337 silencing through the dimeric SFiNX complex. *Genes & development* *35*, 392-409.
- 1338 Shen, L., Shao, N., Liu, X., and Nestler, E. (2014). ngs.plot: Quick mining and visualization of next-  
1339 generation sequencing data by integrating genomic databases. *BMC Genomics* *15*, 284.
- 1340 Sienski, G., Batki, J., Senti, K.A., Donertas, D., Tirian, L., Meixner, K., and Brennecke, J. (2015).  
1341 Silencio/CG9754 connects the Piwi-piRNA complex to the cellular heterochromatin machinery. *Genes*  
1342 *& development* *29*, 2258-2271.
- 1343 Sienski, G., Donertas, D., and Brennecke, J. (2012). Transcriptional silencing of transposons by Piwi and  
1344 maelstrom and its impact on chromatin state and gene expression. *Cell* *151*, 964-980.
- 1345 Sigler, P.B. (1988). Transcriptional activation. Acid blobs and negative noodles. *Nature* *333*, 210-212.
- 1346 Siomi, M.C., Sato, K., Pezic, D., and Aravin, A.A. (2011). PIWI-interacting small RNAs: the vanguard  
1347 of genome defence. *Nature reviews Molecular cell biology* *12*, 246-258.
- 1348 Skene, P.J., Henikoff, J.G., and Henikoff, S. (2018). Targeted in situ genome-wide profiling with high  
1349 efficiency for low cell numbers. *Nature protocols* *13*, 1006-1019.

- 1350 Tuttle, L.M., Pacheco, D., Warfield, L., Luo, J., Ranish, J., Hahn, S., and Klevit, R.E. (2018). Gcn4-  
1351 Mediator Specificity Is Mediated by a Large and Dynamic Fuzzy Protein-Protein Complex. *Cell reports*  
1352 *22*, 3251-3264.
- 1353 Urena, E., Pirone, L., Chafino, S., Perez, C., Sutherland, J.D., Lang, V., Rodriguez, M.S., Lopitz-Otsoa,  
1354 F., Blanco, F.J., Barrio, R., *et al.* (2016). Evolution of SUMO Function and Chain Formation in Insects.  
1355 *Molecular biology and evolution* *33*, 568-584.
- 1356 Vagin, V.V., Sigova, A., Li, C., Seitz, H., Gvozdev, V., and Zamore, P.D. (2006). A distinct small RNA  
1357 pathway silences selfish genetic elements in the germline. *Science* *313*, 320-324.
- 1358 Wang, S.H., and Elgin, S.C. (2011). *Drosophila* Piwi functions downstream of piRNA production  
1359 mediating a chromatin-based transposon silencing mechanism in female germ line. *Proceedings of the*  
1360 *National Academy of Sciences of the United States of America* *108*, 21164-21169.
- 1361 Yang, F., Quan, Z., Huang, H., He, M., Liu, X., Cai, T., and Xi, R. (2019). Ovaries absent links dLsd1  
1362 to HP1a for local H3K4 demethylation required for heterochromatic gene silencing. *Elife* *8*.
- 1363 Yang, P., Wang, Y., and Macfarlan, T.S. (2017). The Role of KRAB-ZFPs in Transposable Element  
1364 Repression and Mammalian Evolution. *Trends Genet* *33*, 871-881.
- 1365 Yu, Y., Gu, J., Jin, Y., Luo, Y., Preall, J.B., Ma, J., Czech, B., and Hannon, G.J. (2015). Panoramix  
1366 enforces piRNA-dependent cotranscriptional silencing. *Science* *350*, 339-342.
- 1367 Zhao, K., Cheng, S., Miao, N., Xu, P., Lu, X., Zhang, Y., Wang, M., Ouyang, X., Yuan, X., Liu, W., *et*  
1368 *al.* (2019). A Pandas complex adapted for piRNA-guided transcriptional silencing and heterochromatin  
1369 formation. *Nature cell biology* *21*, 1261-1272.
- 1370 Zhao, Q., Xie, Y., Zheng, Y., Jiang, S., Liu, W., Mu, W., Liu, Z., Zhao, Y., Xue, Y., and Ren, J. (2014).  
1371 GPS-SUMO: a tool for the prediction of sumoylation sites and SUMO-interaction motifs. *Nucleic acids*  
1372 *research* *42*, W325-330.
- 1373 Zimmermann, L., Stephens, A., Nam, S.Z., Rau, D., Kubler, J., Lozajic, M., Gabler, F., Soding, J., Lupas,  
1374 A.N., and Alva, V. (2018). A Completely Reimplemented MPI Bioinformatics Toolkit with a New  
1375 HHpred Server at its Core. *J Mol Biol* *430*, 2237-2243.
- 1376

**Figure 1**

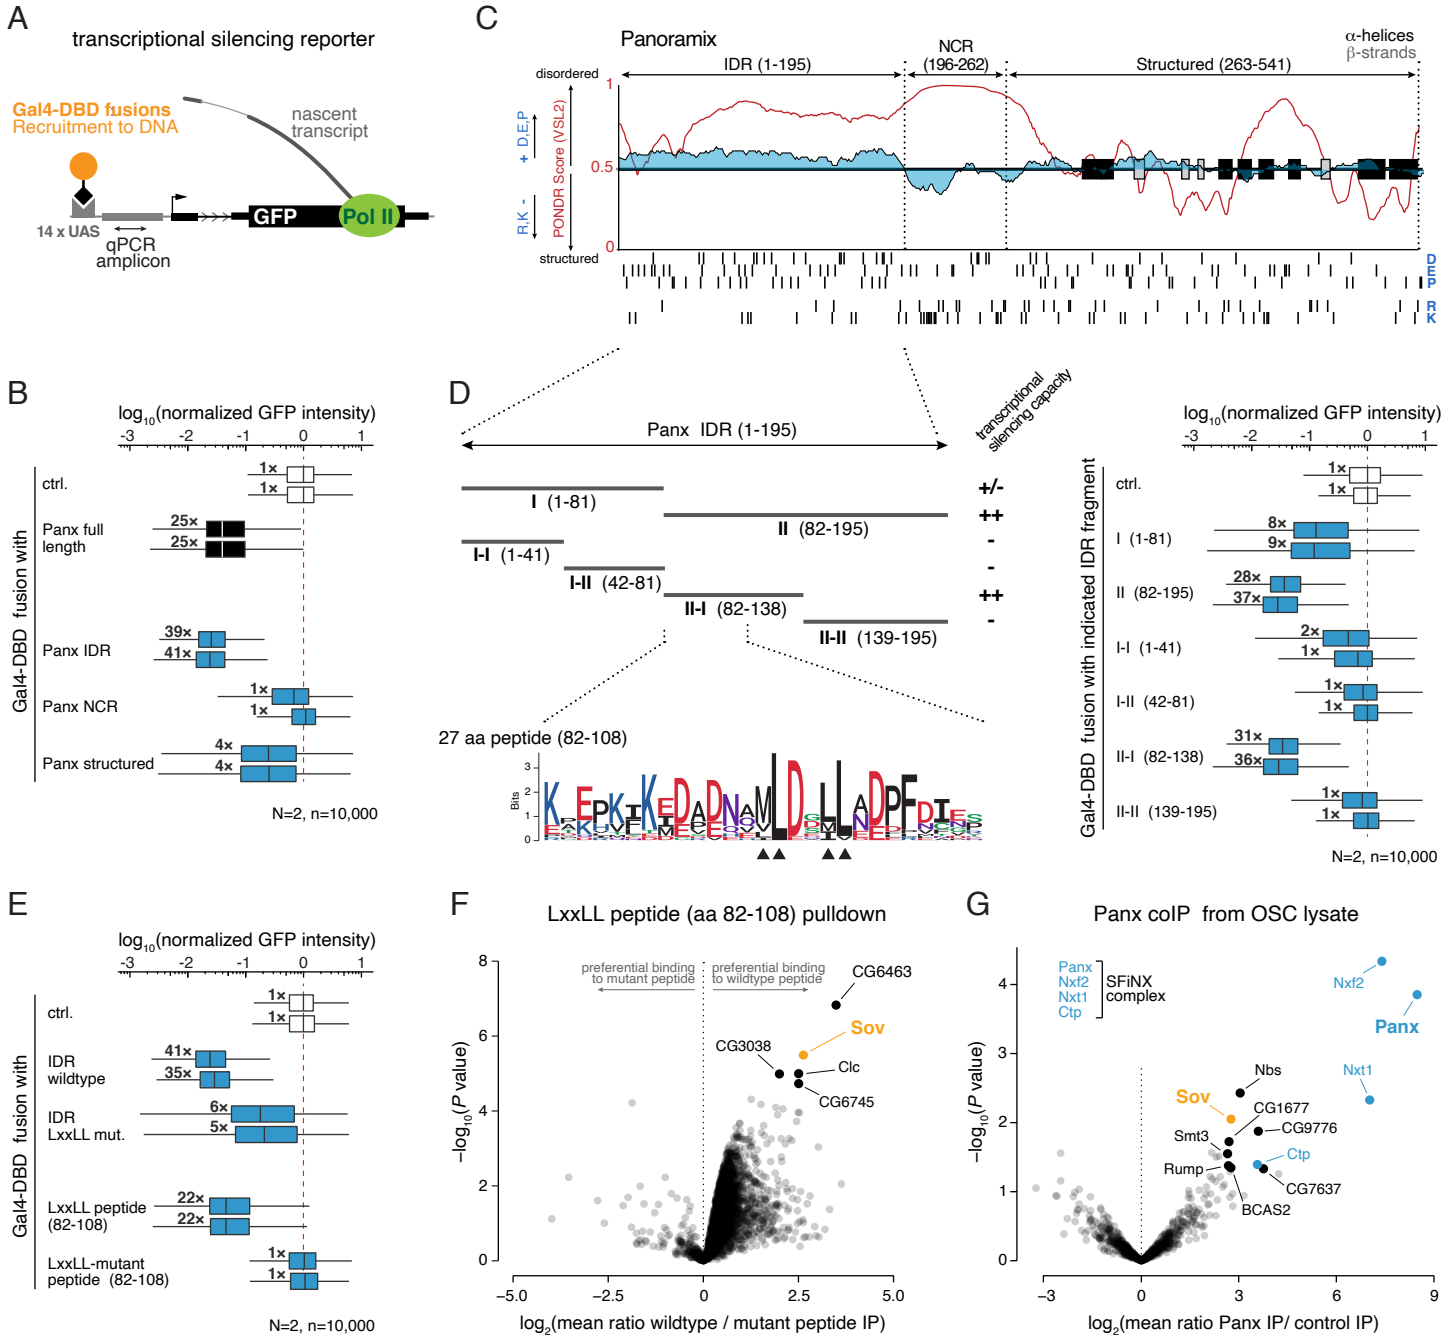





Figure 3

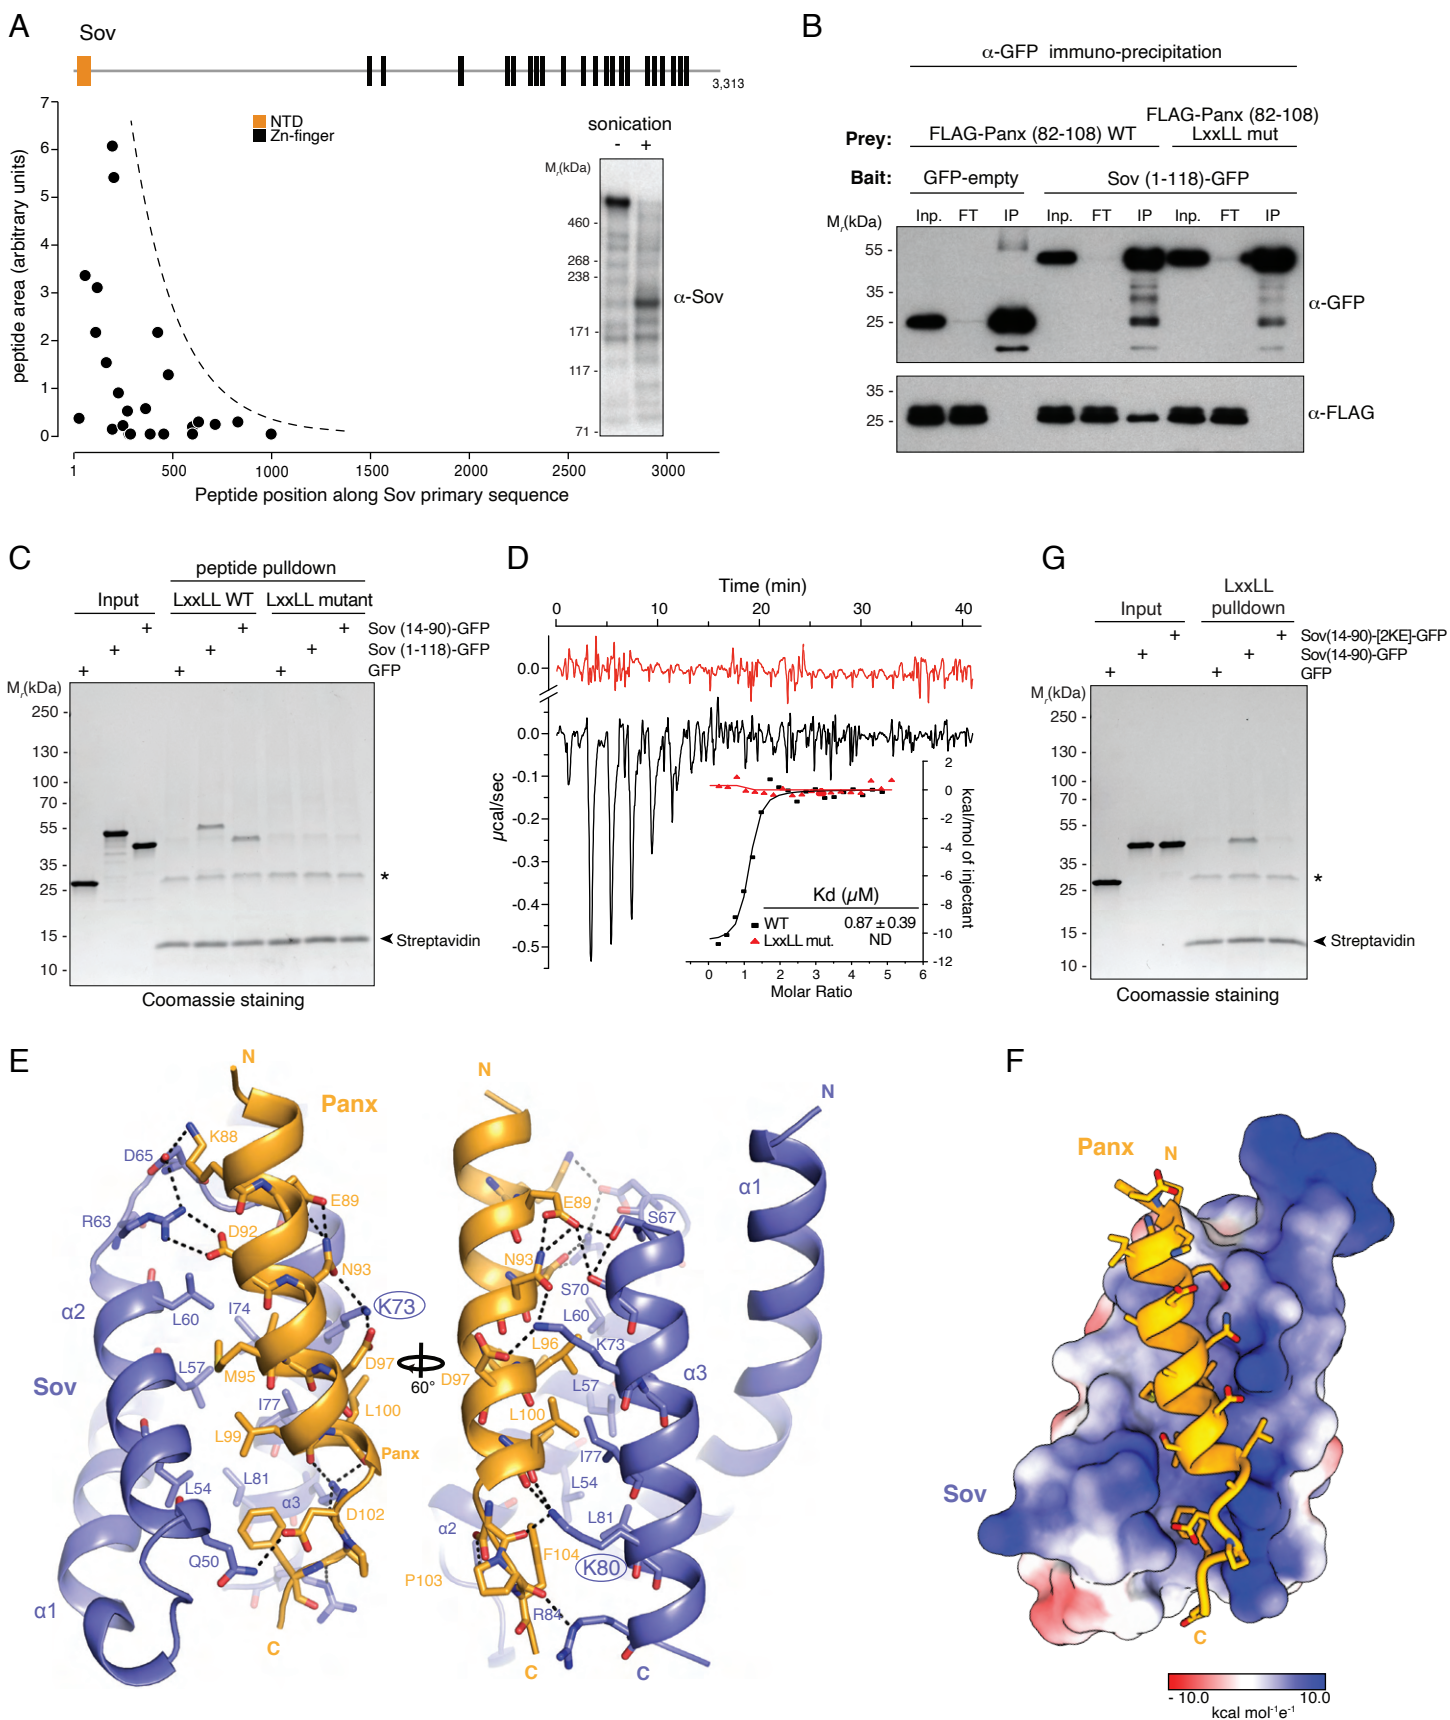

## Figure 4

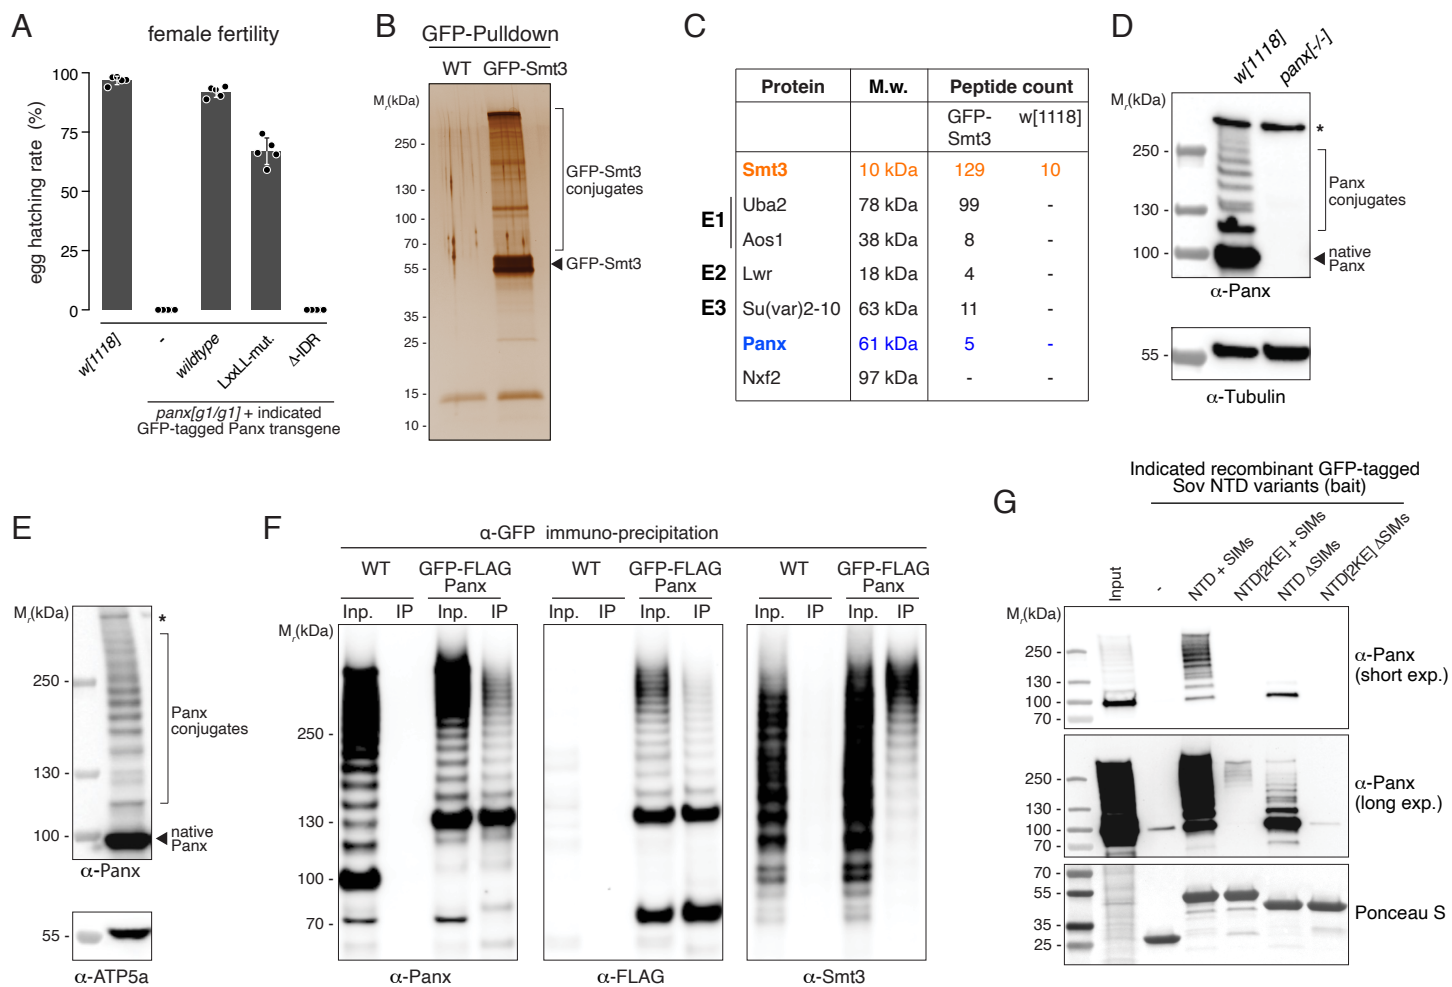

**Figure 5**

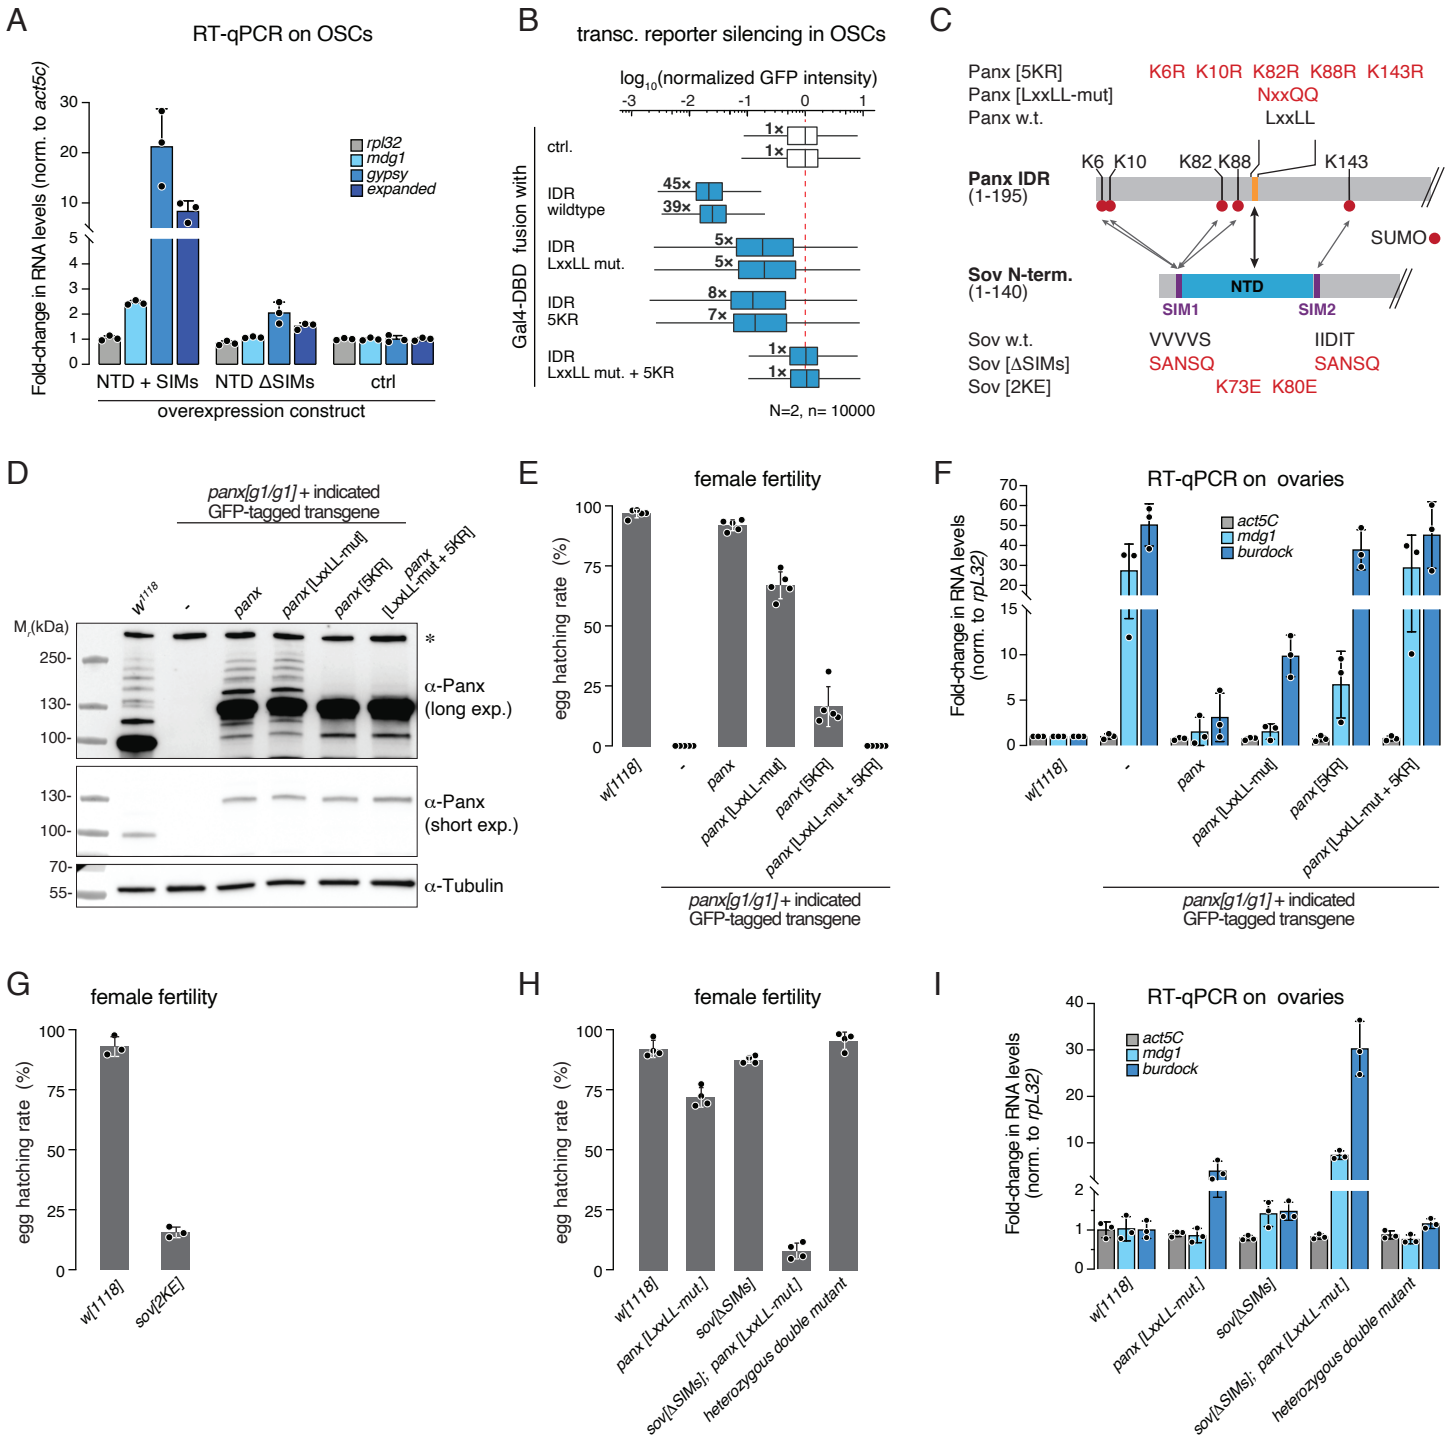

Figure 6

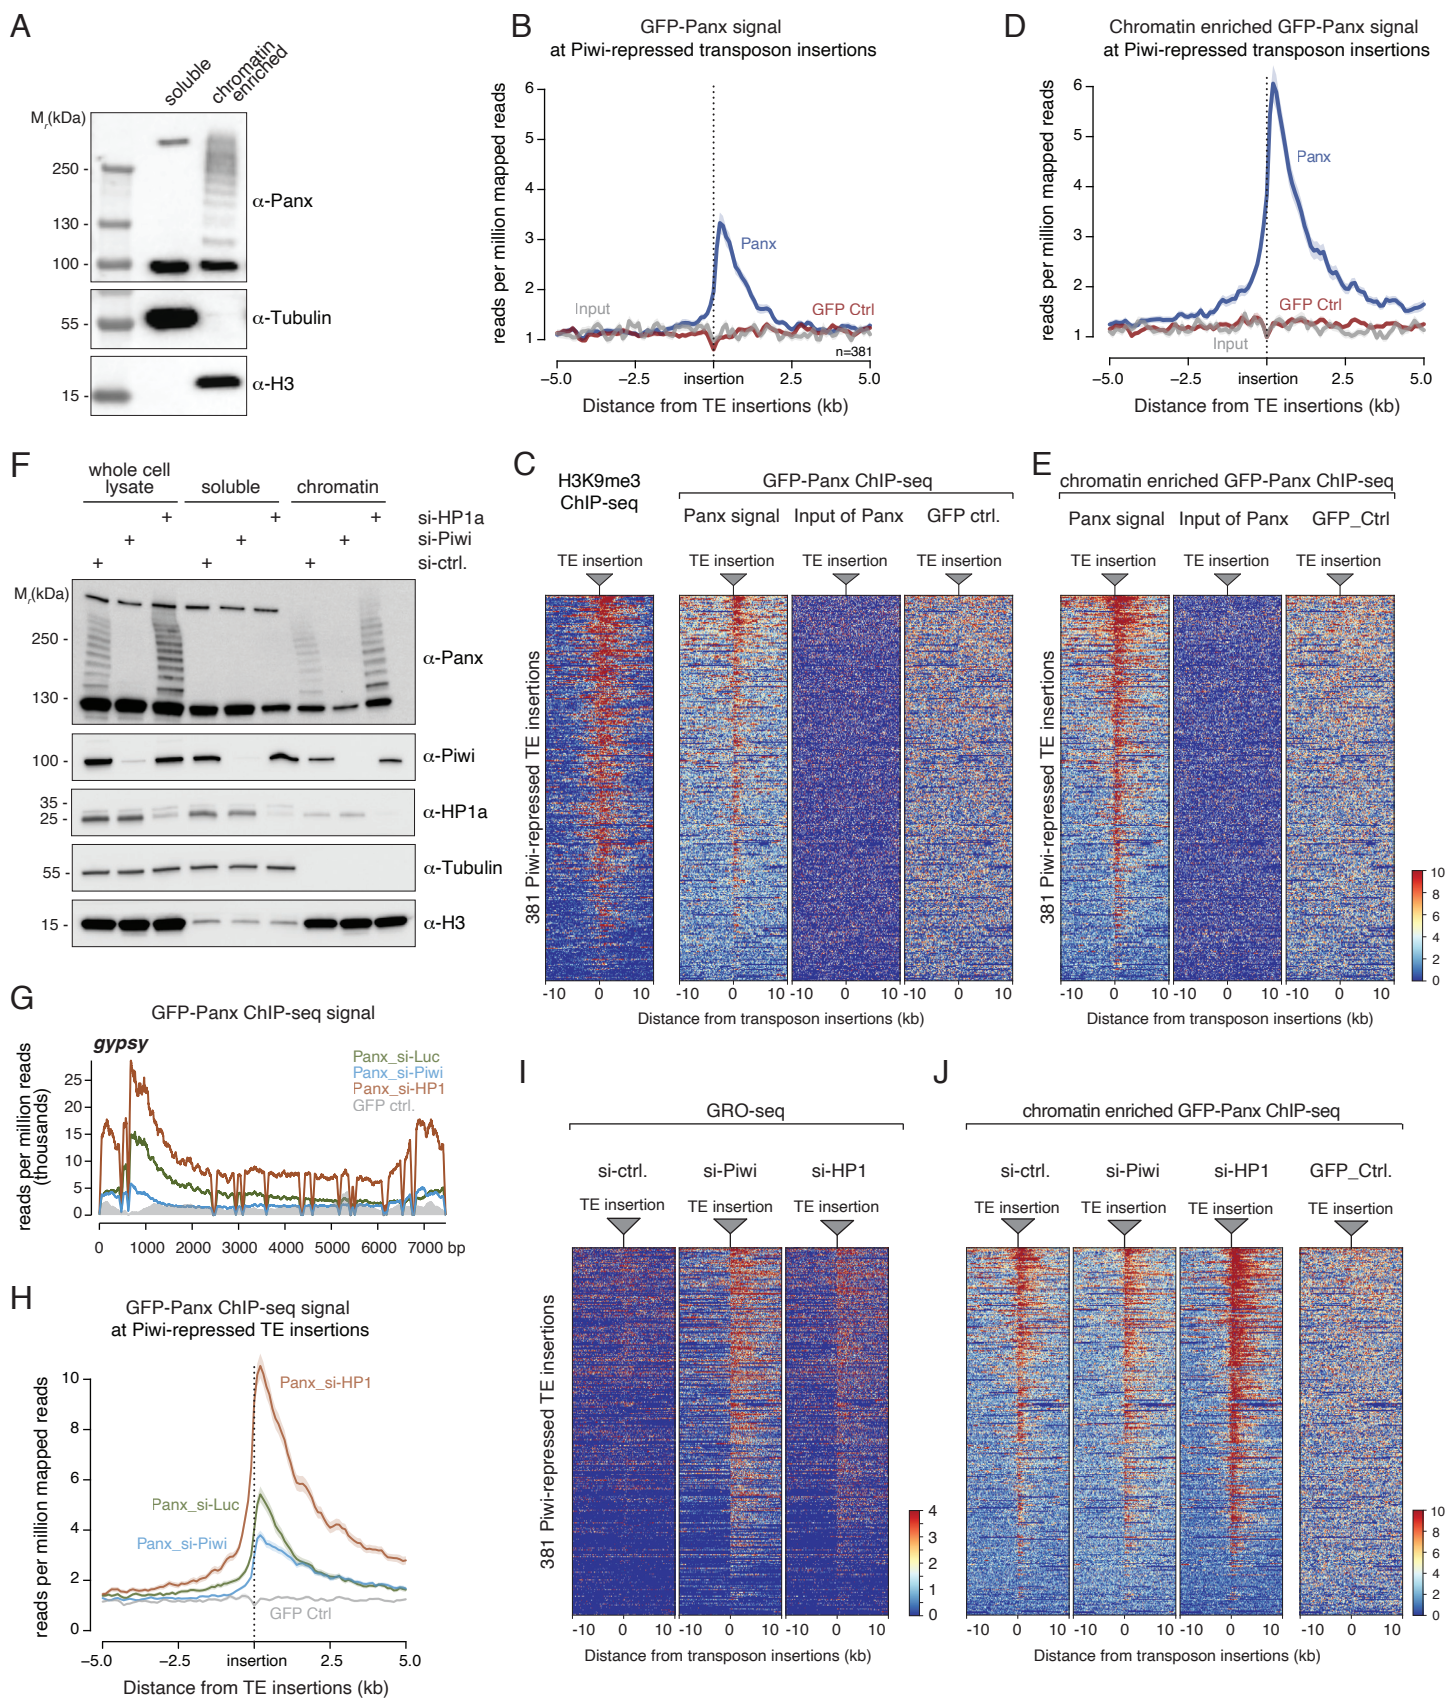

Figure 7

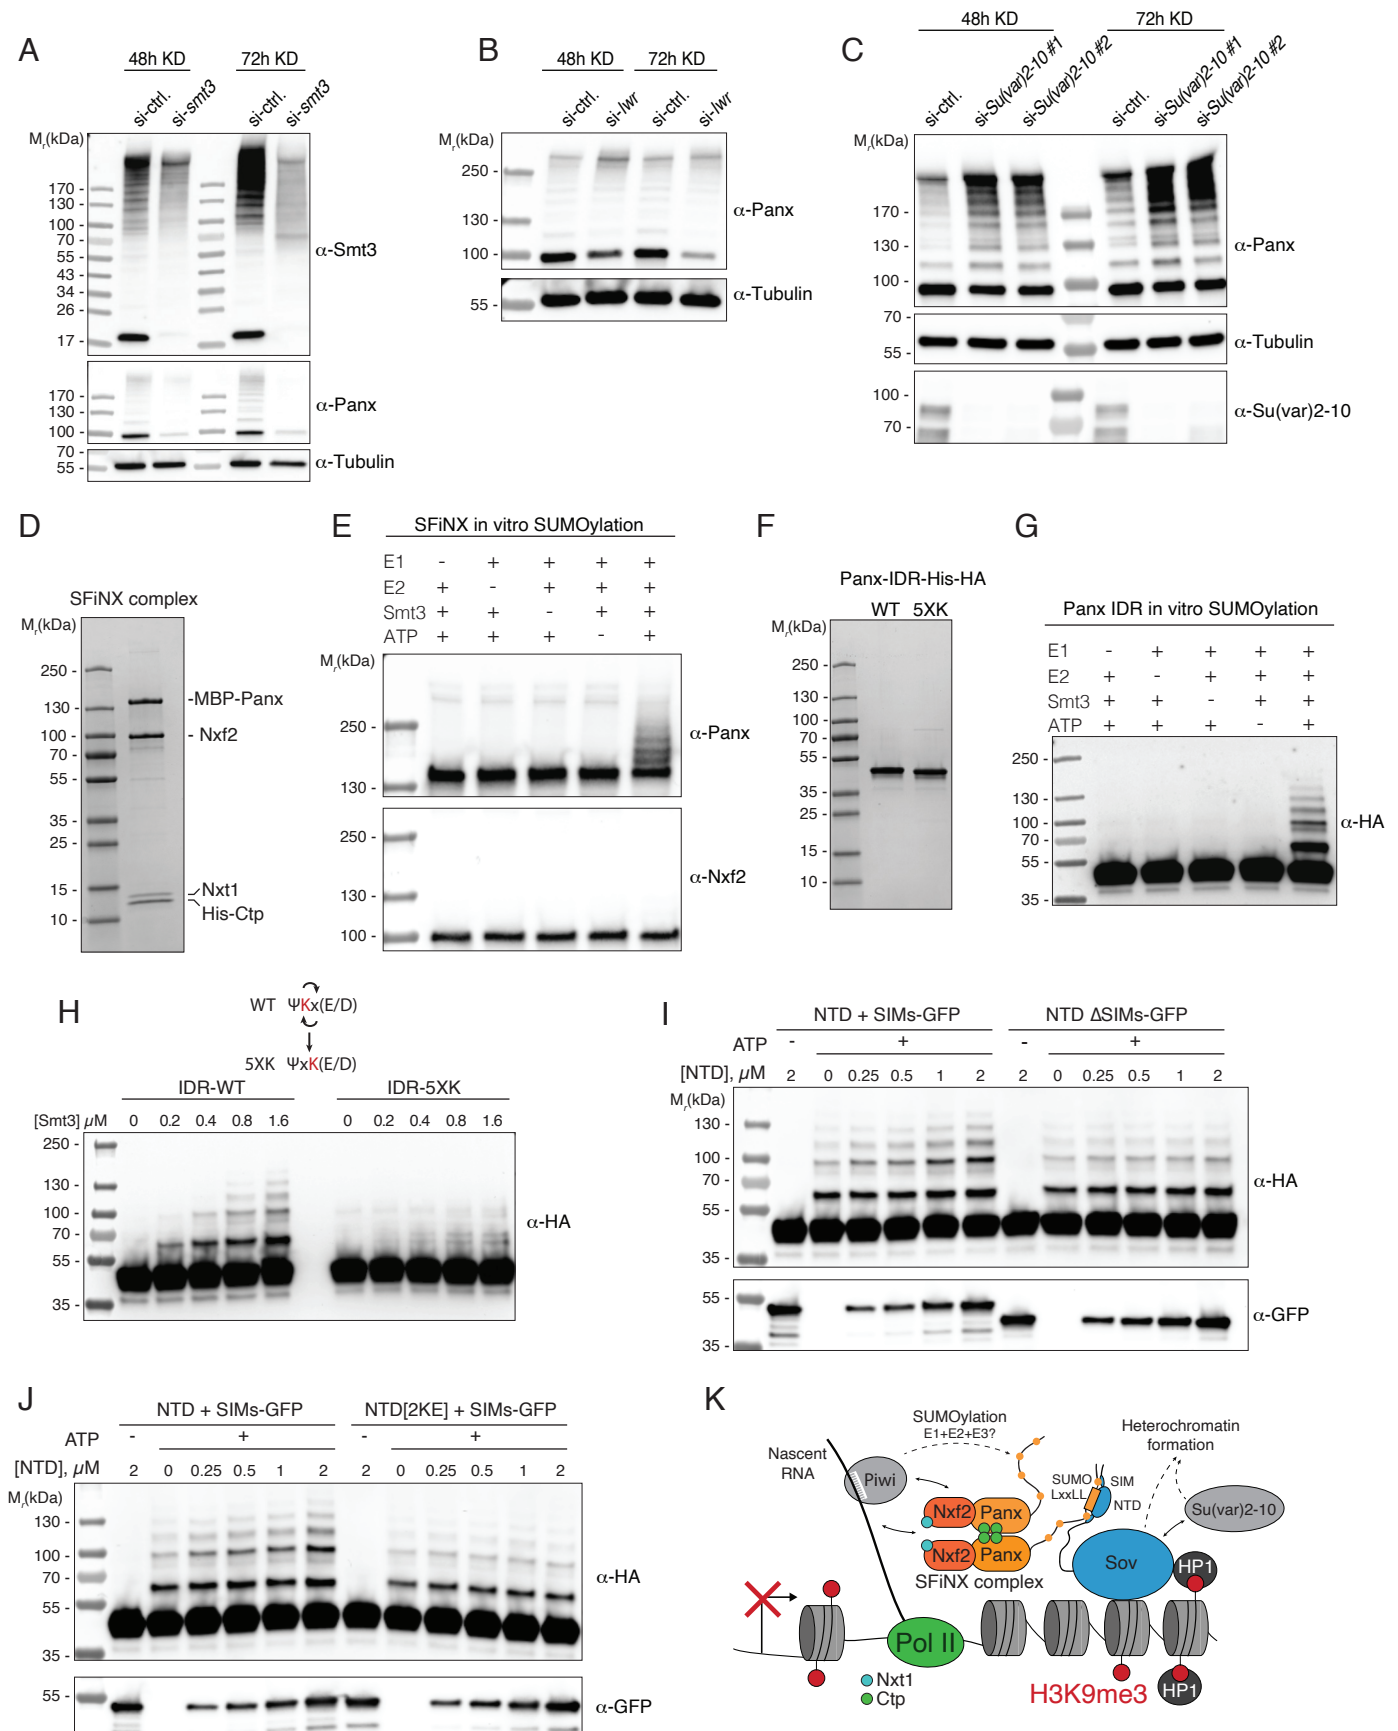

## Supplementary Figure 1

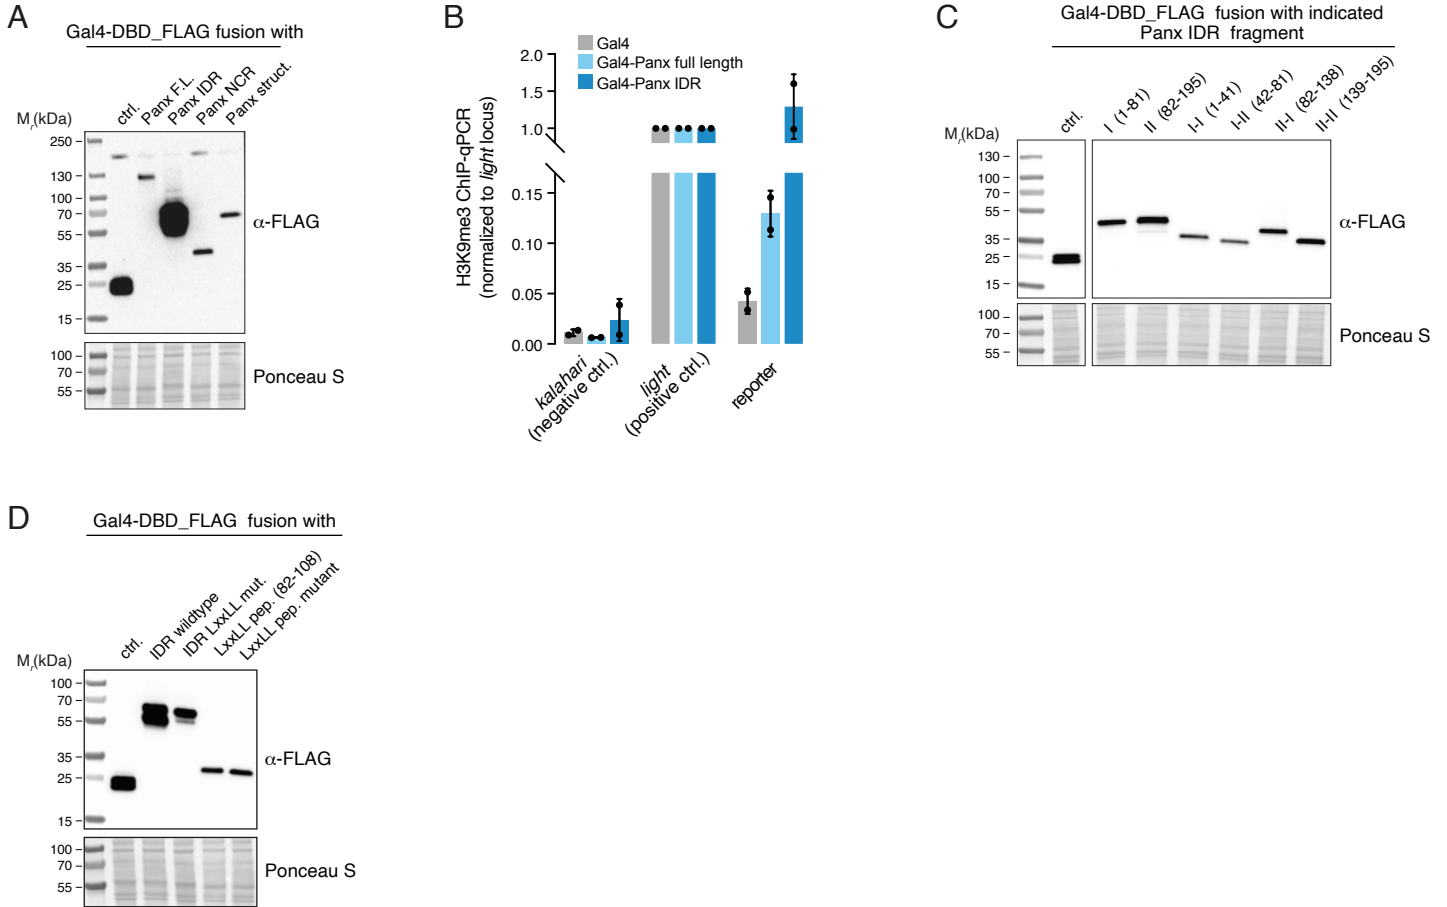

## Supplementary Figure 2

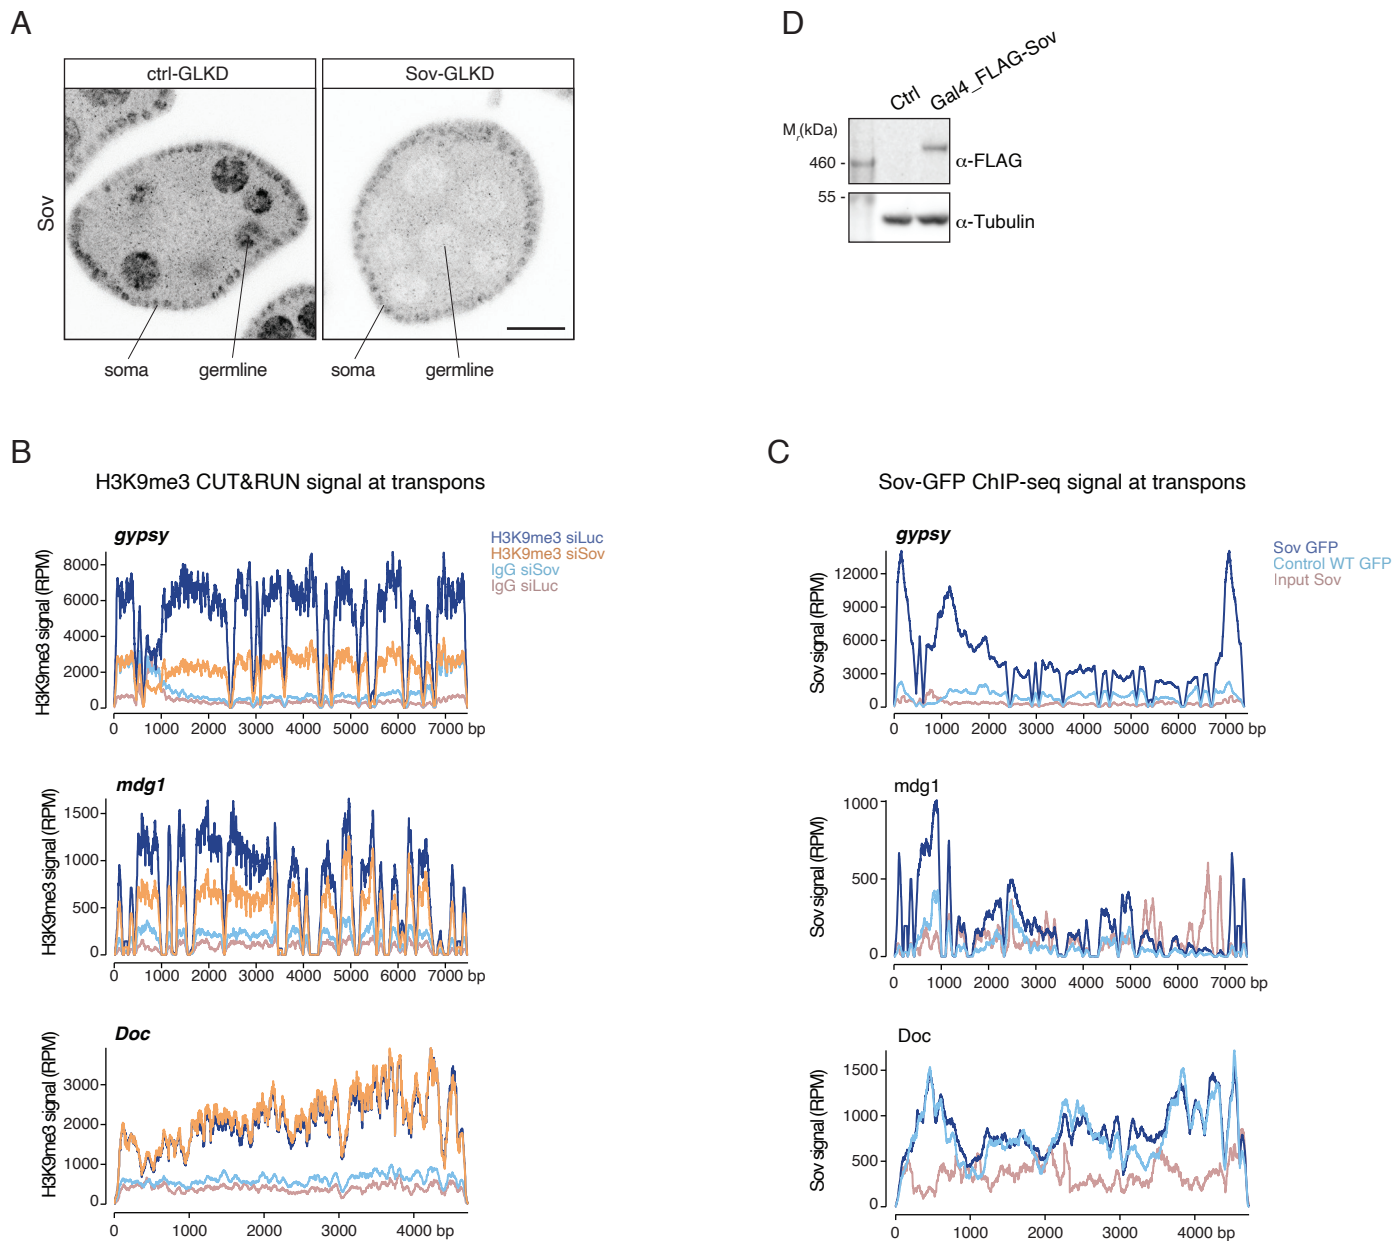



### Supplementary Figure 3

A

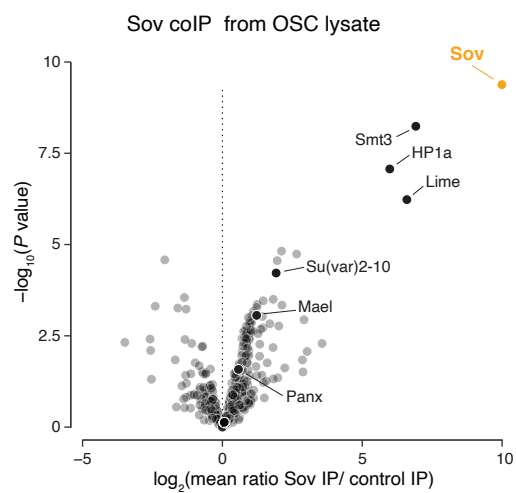

B

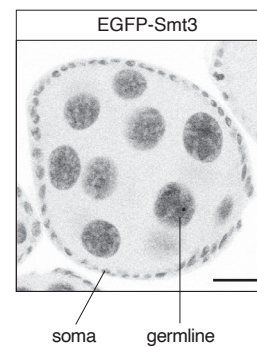

## Supplementary Figure 4

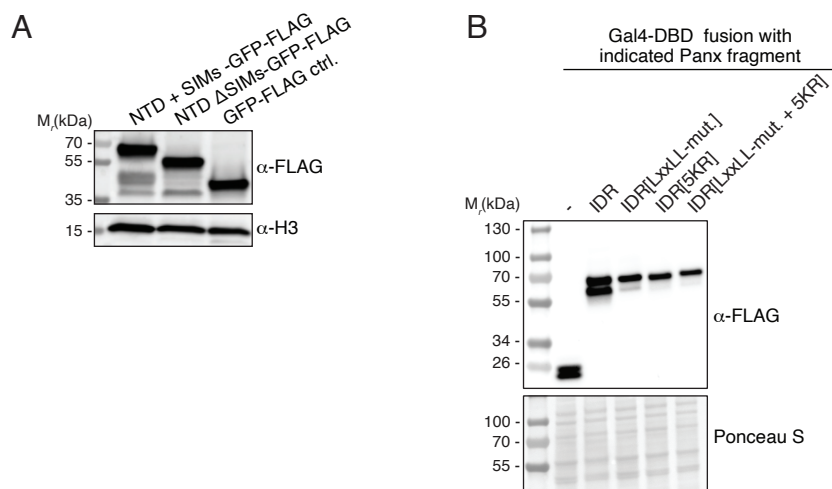

## Supplementary Figure 5

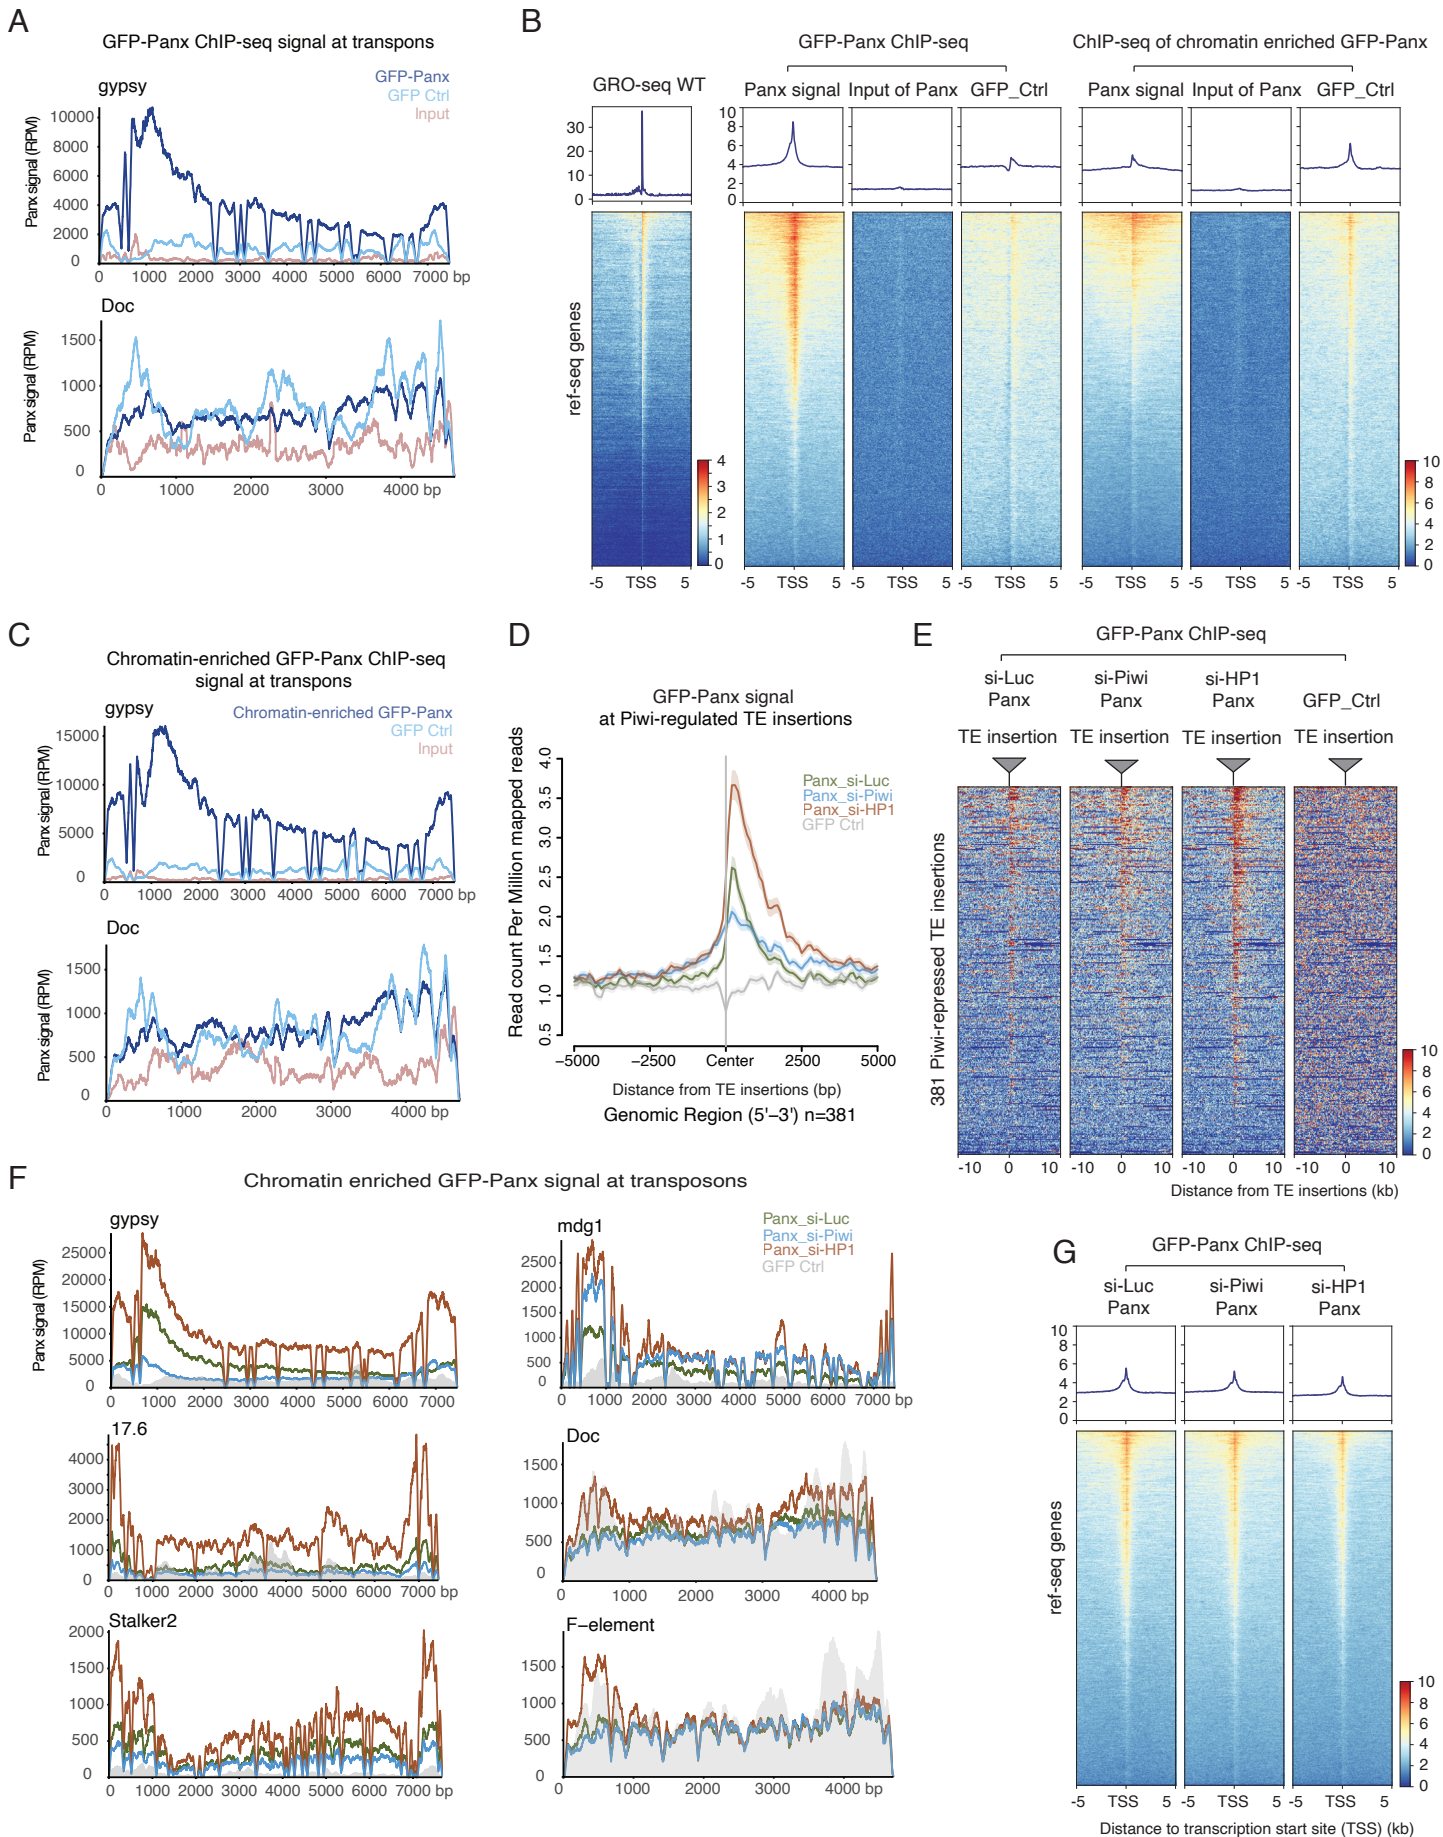

## Supplementary Figure 6

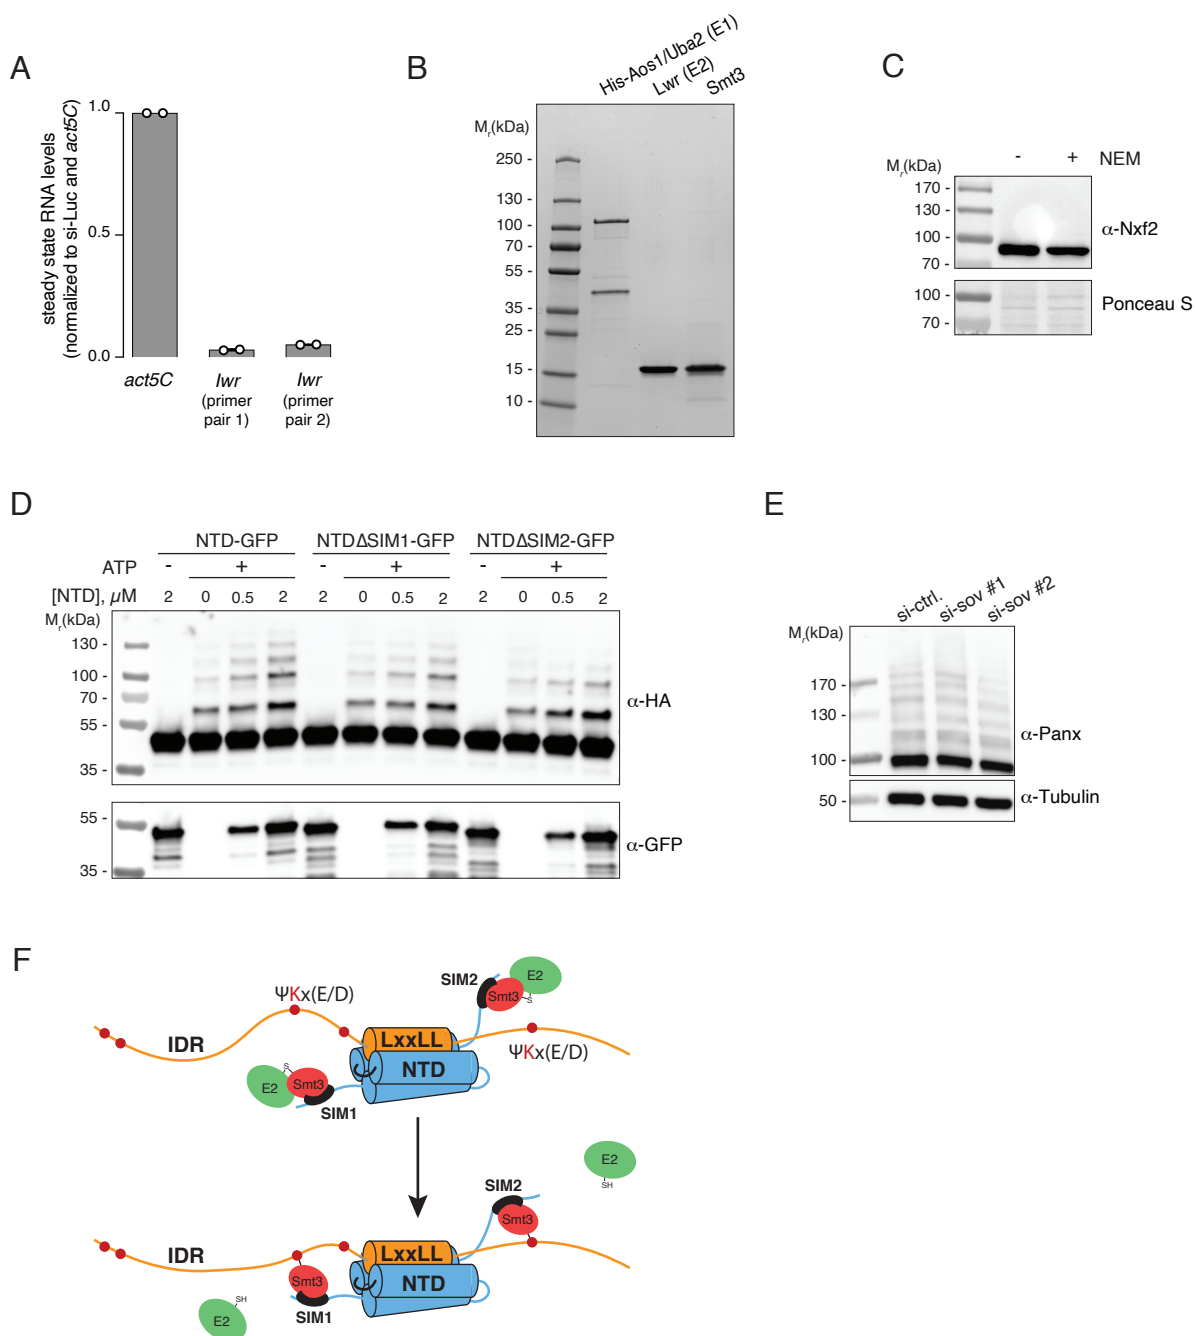

Source: http://biorxiv.org/content/10.1101/2021.07.27.453956v1.full.pdf
